# Supplementary material
Source: Research Square preprint supplement (doi:10.21203/rs.3.rs-8538859/v1)
Supplement: Supplementary file 1 [file 30ed52e9e24675657b2d58e4.xlsx]

## Sheet: TEM_particle_size
Particle_ID	Diameter_nm
1	3.2
2	3.5
3	3.1
4	3.8
5	3.4

## Sheet: EDS_spectrum
Element	Line Type	Apparent Concentration	k Ratio	Wt%	Wt% Sigma	Atomic %	Standard Label	Factory Standard
C	K series	2.87	0.02874	56.9	0.41	66.2	C Vit	Yes
O	K series	2.55	0.00859	34.53	0.38	30.15	SiO2	Yes
Na	K series	0.07	0.00028	0.47	0.06	0.29	Albite	Yes
Mg	K series	0.14	0.00094	1.21	0.06	0.7	MgO	Yes
Si	K series	0.17	0.00131	1.33	0.06	0.66	SiO2	Yes
S	K series	0.05	0.00043	0.43	0.08	0.19	FeS2	Yes
K	K series	0.34	0.00286	2.78	0.09	0.99	KBr	Yes
Ca	K series	0.27	0.00245	2.35	0.1	0.82	Wollastonite	Yes
Total:				100		100

## Sheet: Line_scan
Distance (µm)	C Ka1_2 (cps)	O Ka1 (cps)	Na Ka1_2 (cps)	Mg Ka1_2 (cps)	Si Ka1 (cps)	S Ka1 (cps)	K Ka1 (cps)	Ca Ka1 (cps)
0	1200	600	200	80	70	60	50	40
0.5	1300	620	205	85	75	65	55	45
1	1250	590	195	78	72	63	57	43
…	…	…	…	…	…	…	…	…
18	1150	570	190	82	74	68	52	41

## Sheet: FTIR
Wavenumber_cm^-1	Absorbance
4400	63.6948
4398	63.6813
4396	63.6675
4394	63.6597
4392	63.6607
4390	63.6677
4388	63.6806
4386	63.6944
4384	63.7101
4382	63.7227
4380	63.7291
4378	63.7294
4376	63.7206
4374	63.7026
4372	63.6756
4370	63.6486
4368	63.6244
4366	63.6091
4364	63.6027
4362	63.6022
4360	63.6017
4358	63.5951
4356	63.5796
4354	63.564
4352	63.5455
4350	63.53
4348	63.5204
4346	63.5168
4344	63.5192
4342	63.5216
4340	63.533
4338	63.5474
4336	63.5678
4334	63.5942
4332	63.6237
4330	63.6473
4328	63.668
4326	63.6799
4324	63.683
4322	63.6773
4320	63.6659
4318	63.6486
4316	63.6227
4314	63.5939
4312	63.5595
4310	63.5252
4308	63.4971
4306	63.484
4304	63.4889
4302	63.5148
4300	63.5498
4298	63.5939
4296	63.6353
4294	63.6681
4292	63.6864
4290	63.6931
4288	63.6652
4286	63.6366
4284	63.6021
4282	63.5616
4280	63.524
4278	63.4923
4276	63.4694
4274	63.4554
4272	63.4531
4270	63.4596
4268	63.472
4266	63.4903
4264	63.5056
4262	63.5179
4260	63.5243
4258	63.5249
4256	63.5136
4254	63.4995
4252	63.4824
4250	63.4742
4248	63.469
4246	63.4726
4244	63.4852
4242	63.5036
4240	63.528
4238	63.5495
4236	63.574
4234	63.5897
4232	63.6026
4230	63.6155
4228	63.6285
4226	63.6475
4224	63.6666
4222	63.677
4220	63.6758
4218	63.66
4216	63.6327
4214	63.5967
4212	63.5579
4210	63.5251
4208	63.4954
4206	63.4718
4204	63.4512
4202	63.4367
4200	63.4282
4198	63.4229
4196	63.4236
4194	63.4303
4192	63.4372
4190	63.4443
4188	63.4487
4186	63.4534
4184	63.4553
4182	63.4574
4180	63.4628
4178	63.4654
4176	63.4712
4174	63.4714
4172	63.4718
4170	63.4696
4168	63.4677
4166	63.4631
4164	63.4588
4162	63.4548
4160	63.4511
4158	63.4448
4156	63.4359
4154	63.4302
4152	63.4306
4150	63.4431
4148	63.4646
4146	63.4894
4144	63.5204
4142	63.5429
4140	63.5658
4138	63.5832
4136	63.601
4134	63.6221
4132	63.6436
4130	63.6596
4128	63.673
4126	63.6723
4124	63.6917
4122	63.6774
4120	63.6576
4118	63.6352
4116	63.6131
4114	63.5883
4112	63.5668
4110	63.5455
4108	63.5246
4106	63.5097
4104	63.501
4102	63.5013
4100	63.5048
4098	63.5144
4096	63.5243
4094	63.5345
4092	63.5449
4090	63.5469
4088	63.5491
4086	63.5428
4084	63.5339
4082	63.5252
4080	63.5139
4078	63.5086
4076	63.5124
4074	63.5281
4072	63.5587
4070	63.5984
4068	63.6412
4066	63.6784
4064	63.7042
4062	63.7156
4060	63.7155
4058	63.7099
4056	63.6986
4054	63.6846
4052	63.6709
4050	63.6574
4048	63.65
4046	63.6428
4044	63.6417
4042	63.6437
4040	63.646
4038	63.6514
4036	63.657
4034	63.6629
4032	63.669
4030	63.6724
4028	63.6759
4026	63.6827
4024	63.6867
4022	63.685
4020	63.6836
4018	63.6765
4016	63.6637
4014	63.6511
4012	63.6387
4010	63.6353
4008	63.6321
4006	63.6291
4004	63.6233
4002	63.6148
4000	63.6035
3998	63.5954
3996	63.5904
3994	63.5943
3992	63.6015
3990	63.6117
3988	63.6251
3986	63.6327
3984	63.6376
3982	63.6368
3980	63.6302
3978	63.6149
3976	63.5998
3974	63.5878
3972	63.5848
3970	63.5909
3968	63.603
3966	63.6241
3964	63.6484
3962	63.6758
3960	63.6885
3958	63.6758
3956	63.6567
3954	63.6266
3952	63.5915
3950	63.5631
3948	63.5502
3946	63.547
3944	63.5563
3942	63.5693
3940	63.5829
3938	63.5941
3936	63.5969
3934	63.5943
3932	63.5833
3930	63.5756
3928	63.5682
3926	63.5731
3924	63.5902
3922	63.6195
3920	63.6638
3918	63.7144
3916	63.7681
3914	63.8011
3912	63.8162
3910	63.7924
3908	63.7417
3906	63.6819
3904	63.6249
3902	63.6036
3900	63.603
3898	63.6202
3896	63.6431
3894	63.6567
3892	63.6669
3890	63.6737
3888	63.6468
3886	63.6587
3884	63.6699
3882	63.6774
3880	63.6815
3878	63.6764
3876	63.665
3874	63.6448
3872	63.6186
3870	63.5899
3868	63.5646
3866	63.5461
3864	63.5405
3862	63.545
3860	63.5628
3858	63.5911
3856	63.6208
3854	63.6729
3852	63.706
3850	63.7359
3848	63.7557
3846	63.7706
3844	63.7765
3842	63.7758
3840	63.7735
3838	63.7719
3836	63.7793
3834	63.8008
3832	63.8419
3830	63.8771
3828	63.8966
3826	63.881
3824	63.8202
3822	63.7532
3820	63.6852
3818	63.6583
3816	63.6687
3814	63.6757
3812	63.6669
3810	63.6305
3808	63.5598
3806	63.4735
3804	63.3805
3802	63.3086
3800	63.2546
3798	63.2247
3796	63.2128
3794	63.2127
3792	63.209
3790	63.1804
3788	63.1238
3786	63.0179
3784	62.887
3782	62.7375
3780	62.5875
3778	62.4495
3776	62.3141
3774	62.1784
3772	62.024
3770	61.8417
3768	61.6469
3766	61.4274
3764	61.2015
3762	60.9631
3760	60.7123
3758	60.4521
3756	60.1794
3754	59.8973
3752	59.6181
3750	59.3509
3748	59.1108
3746	58.904
3744	58.7091
3742	58.5231
3740	58.3186
3738	58.1109
3736	57.8968
3734	57.6916
3732	57.5014
3730	57.3141
3728	57.1234
3726	56.9205
3724	56.6961
3722	56.4443
3720	56.1621
3718	55.8466
3716	55.4886
3714	55.0944
3712	54.6669
3710	54.2244
3708	53.7759
3706	53.3305
3704	52.8853
3702	52.4281
3700	51.9499
3698	51.4328
3696	50.8647
3694	50.2428
3692	49.5701
3690	48.8798
3688	48.1749
3686	47.4885
3684	46.8056
3682	46.1141
3680	45.3842
3678	44.58
3676	43.6956
3674	42.7373
3672	41.7678
3670	40.847
3668	40.0047
3666	39.2496
3664	38.543
3662	37.8549
3660	37.1703
3658	36.4567
3656	35.702
3654	34.8857
3652	34.002
3650	33.0716
3648	32.1749
3646	31.3622
3644	30.6541
3642	30.0533
3640	29.4946
3638	28.969
3636	28.4469
3634	27.9254
3632	27.3897
3630	26.8516
3628	26.3141
3626	25.7979
3624	25.3381
3622	24.9171
3620	24.5406
3618	24.1851
3616	23.8358
3614	23.4899
3612	23.1502
3610	22.8284
3608	22.5275
3606	22.2503
3604	21.9938
3602	21.7551
3600	21.5283
3598	21.3018
3596	21.0755
3594	20.8407
3592	20.5946
3590	20.3487
3588	20.1032
3586	19.8753
3584	19.665
3582	19.4782
3580	19.3147
3578	19.1658
3576	19.0258
3574	18.8858
3572	18.7403
3570	18.5833
3568	18.4237
3566	18.2614
3564	18.1049
3562	17.9688
3560	17.8472
3558	17.7342
3556	17.6214
3554	17.503
3552	17.3818
3550	17.2493
3548	17.1113
3546	16.9734
3544	16.8414
3542	16.7238
3540	16.6233
3538	16.5429
3536	16.471
3534	16.4077
3532	16.336
3530	16.2614
3528	16.1898
3526	16.1153
3524	16.0551
3522	15.9977
3520	15.9488
3518	15.9027
3516	15.8566
3514	15.8078
3512	15.7533
3510	15.6905
3508	15.6137
3506	15.537
3504	15.4575
3502	15.3893
3500	15.3268
3498	15.2783
3496	15.2409
3494	15.2091
3492	15.1828
3490	15.1565
3488	15.1275
3486	15.0929
3484	15.05
3482	15.0071
3480	14.9669
3478	14.9379
3476	14.9171
3474	14.9018
3472	14.8892
3470	14.8766
3468	14.8639
3466	14.854
3464	14.8494
3462	14.8476
3460	14.8512
3458	14.8574
3456	14.8663
3454	14.8724
3452	14.8784
3450	14.887
3448	14.8929
3446	14.8986
3444	14.9044
3442	14.91
3440	14.9155
3438	14.921
3436	14.9318
3434	14.948
3432	14.9748
3430	15.0095
3428	15.0495
3426	15.0947
3424	15.1371
3422	15.1767
3420	15.2187
3418	15.2633
3416	15.3131
3414	15.3654
3412	15.4255
3410	15.4854
3408	15.5504
3406	15.6178
3404	15.6878
3402	15.7654
3400	15.8455
3398	15.9332
3396	16.026
3394	16.1237
3392	16.2291
3390	16.3368
3388	16.4495
3386	16.5592
3384	16.6713
3382	16.7804
3380	16.8892
3378	16.995
3376	17.098
3374	17.2085
3372	17.3239
3370	17.4519
3368	17.5874
3366	17.7329
3364	17.8857
3362	18.0382
3360	18.1928
3358	18.3469
3356	18.5033
3354	18.6643
3352	18.8224
3350	18.98
3348	19.1346
3346	19.2862
3344	19.44
3342	19.5959
3340	19.7615
3338	19.937
3336	20.1145
3334	20.294
3332	20.468
3330	20.6364
3328	20.8018
3326	20.9592
3324	21.1186
3322	21.2751
3320	21.4311
3318	21.5892
3316	21.7443
3314	21.899
3312	22.0533
3310	22.2071
3308	22.358
3306	22.5085
3304	22.651
3302	22.7906
3300	22.9274
3298	23.0612
3296	23.1946
3294	23.3352
3292	23.4827
3290	23.6323
3288	23.784
3286	23.9327
3284	24.0786
3282	24.2215
3280	24.3616
3278	24.4988
3276	24.6356
3274	24.7745
3272	24.9105
3270	25.0511
3268	25.1936
3266	25.3406
3264	25.4872
3262	25.6359
3260	25.7889
3258	25.9367
3256	26.0864
3254	26.2333
3252	26.3798
3250	26.5283
3248	26.6836
3246	26.8456
3244	27.0145
3242	27.1949
3240	27.382
3238	27.5758
3236	27.7786
3234	27.9928
3232	28.2112
3230	28.441
3228	28.6749
3226	28.9129
3224	29.1526
3222	29.3917
3220	29.6396
3218	29.8964
3216	30.1619
3214	30.4432
3212	30.7285
3210	31.0201
3208	31.3086
3206	31.601
3204	31.8926
3202	32.1857
3200	32.4875
3198	32.7931
3196	33.1073
3194	33.4299
3192	33.7634
3190	34.1006
3188	34.4416
3186	34.7863
3184	35.1278
3182	35.4707
3180	35.8057
3178	36.1422
3176	36.4732
3174	36.8055
3172	37.1394
3170	37.4815
3168	37.8296
3166	38.1814
3164	38.5368
3162	38.8913
3160	39.2426
3158	39.593
3156	39.9379
3154	40.2819
3152	40.625
3150	40.9626
3148	41.3017
3146	41.6398
3144	41.9794
3142	42.3203
3140	42.6603
3138	42.9994
3136	43.3377
3134	43.6728
3132	44.0026
3130	44.327
3128	44.6484
3126	44.9622
3124	45.2708
3122	45.5785
3120	45.8855
3118	46.1916
3116	46.4992
3114	46.8083
3112	47.1188
3110	47.4285
3108	47.7352
3106	48.0389
3104	48.3352
3102	48.6263
3100	48.9102
3098	49.1867
3096	49.4537
3094	49.7135
3092	49.9683
3090	50.218
3088	50.4671
3086	50.7135
3084	50.9614
3082	51.2108
3080	51.4619
3078	51.7123
3076	51.9621
3074	52.2091
3072	52.4512
3070	52.6906
3068	52.9229
3066	53.1503
3064	53.3772
3062	53.6015
3060	53.8273
3058	54.0483
3056	54.2667
3054	54.4781
3052	54.6869
3050	54.8888
3048	55.0838
3046	55.2741
3044	55.4619
3042	55.645
3040	55.8256
3038	56.0057
3036	56.1876
3034	56.367
3032	56.5481
3030	56.7309
3028	56.9112
3026	57.0891
3024	57.2644
3022	57.4331
3020	57.5993
3018	57.7631
3016	57.9244
3014	58.0834
3012	58.2399
3010	58.3878
3008	58.5291
3006	58.6639
3004	58.7923
3002	58.9162
3000	59.0399
2998	59.1613
2996	59.2826
2994	59.4015
2992	59.5161
2990	59.6284
2988	59.7344
2986	59.8382
2984	59.9356
2982	60.0288
2980	60.1177
2978	60.2025
2976	60.283
2974	60.3635
2972	60.4418
2970	60.52
2968	60.6022
2966	60.6823
2964	60.7664
2962	60.8503
2960	60.9363
2958	61.0181
2956	61.0977
2954	61.1733
2952	61.2448
2950	61.3102
2948	61.3715
2946	61.4288
2944	61.482
2942	61.5332
2940	61.5804
2938	61.6257
2936	61.6669
2934	61.7102
2932	61.7535
2930	61.7969
2928	61.8463
2926	61.8997
2924	61.959
2922	62.0244
2920	62.0918
2918	62.1631
2916	62.2344
2914	62.3057
2912	62.3751
2910	62.4405
2908	62.5019
2906	62.5614
2904	62.6151
2902	62.6648
2900	62.7107
2898	62.7547
2896	62.7948
2894	62.837
2892	62.8773
2890	62.9216
2888	62.962
2886	63.0046
2884	63.0413
2882	63.0762
2880	63.1054
2878	63.1328
2876	63.1544
2874	63.1723
2872	63.1865
2870	63.197
2868	63.2057
2866	63.2146
2864	63.2256
2862	63.2406
2860	63.2635
2858	63.2885
2856	63.3194
2854	63.3505
2852	63.3817
2850	63.4131
2848	63.4427
2846	63.4706
2844	63.4948
2842	63.5192
2840	63.5399
2838	63.5608
2836	63.58
2834	63.5955
2832	63.6094
2830	63.6196
2828	63.6263
2826	63.6332
2824	63.6403
2822	63.6476
2820	63.6551
2818	63.6629
2816	63.6709
2814	63.6773
2812	63.6839
2810	63.6869
2808	63.6883
2806	63.69
2804	63.69
2802	63.6903
2800	63.6908
2798	63.6954
2796	63.6983
2794	63.7034
2792	63.703
2790	63.7049
2788	63.7053
2786	63.7022
2784	63.6956
2782	63.6839
2780	63.6708
2778	63.6562
2776	63.6402
2774	63.6245
2772	63.611
2770	63.6014
2768	63.594
2766	63.5886
2764	63.5834
2762	63.5802
2760	63.5736
2758	63.5671
2756	63.5572
2754	63.5475
2752	63.5361
2750	63.5268
2748	63.5159
2746	63.5051
2744	63.4963
2742	63.4876
2740	63.481
2738	63.4727
2736	63.4664
2734	63.4584
2732	63.4525
2730	63.4466
2728	63.4391
2726	63.4354
2724	63.43
2722	63.4266
2720	63.4233
2718	63.4221
2716	63.4228
2714	63.4218
2712	63.4229
2710	63.4224
2708	63.4204
2706	63.417
2704	63.4121
2702	63.4059
2700	63.4019
2698	63.3965
2696	63.3933
2694	63.3904
2692	63.3897
2690	63.3875
2688	63.3876
2686	63.3864
2684	63.3858
2682	63.3841
2680	63.3831
2678	63.3811
2676	63.3799
2674	63.3774
2672	63.3738
2670	63.3705
2668	63.3676
2666	63.3631
2664	63.3588
2662	63.3565
2660	63.3526
2658	63.3505
2656	63.3468
2654	63.345
2652	63.3451
2650	63.3453
2648	63.3456
2646	63.3479
2644	63.3521
2642	63.3582
2640	63.3645
2638	63.3692
2636	63.3761
2634	63.3816
2632	63.3859
2630	63.3873
2628	63.3859
2626	63.3852
2624	63.3834
2622	63.3821
2620	63.3831
2618	63.3843
2616	63.3875
2614	63.3891
2612	63.3927
2610	63.3945
2608	63.3983
2606	63.4022
2604	63.4062
2602	63.4105
2600	63.4131
2598	63.4161
2596	63.4193
2594	63.4229
2592	63.4268
2590	63.431
2588	63.4339
2586	63.4389
2584	63.4424
2582	63.4445
2580	63.4468
2578	63.4511
2576	63.4555
2574	63.4619
2572	63.4666
2570	63.4697
2568	63.4675
2566	63.4636
2564	63.4598
2562	63.4543
2560	63.4541
2558	63.4577
2556	63.4648
2554	63.4755
2552	63.488
2550	63.5007
2548	63.5133
2546	63.5243
2544	63.5318
2542	63.5376
2540	63.5417
2538	63.5458
2536	63.55
2534	63.5543
2532	63.5604
2530	63.5683
2528	63.5763
2526	63.5845
2524	63.5945
2522	63.6012
2520	63.608
2518	63.6133
2516	63.6189
2514	63.6246
2512	63.6304
2510	63.6347
2508	63.6372
2506	63.6363
2504	63.6337
2502	63.6276
2500	63.6216
2498	63.6156
2496	63.6079
2494	63.6038
2492	63.5997
2490	63.5974
2488	63.5986
2486	63.6016
2484	63.6065
2482	63.6131
2480	63.6215
2478	63.6299
2476	63.6366
2474	63.6416
2472	63.6466
2470	63.6481
2468	63.6496
2466	63.6512
2464	63.6545
2462	63.6561
2460	63.6612
2458	63.6663
2456	63.6732
2454	63.6819
2452	63.6906
2450	63.6976
2448	63.7028
2446	63.7062
2444	63.7062
2442	63.7044
2440	63.7009
2438	63.6974
2436	63.6956
2434	63.6939
2432	63.6957
2430	63.6957
2428	63.6975
2426	63.6975
2424	63.6957
2422	63.694
2420	63.6904
2418	63.6864
2416	63.6829
2414	63.6814
2412	63.6814
2410	63.6827
2408	63.6866
2406	63.6892
2404	63.6941
2402	63.6996
2400	63.7024
2398	63.7023
2396	63.694
2394	63.6706
2392	63.632
2390	63.5694
2388	63.4828
2386	63.3669
2384	63.2199
2382	63.0383
2380	62.8238
2378	62.5798
2376	62.3133
2374	62.0382
2372	61.7563
2370	61.4903
2368	61.2489
2366	61.0635
2364	60.9693
2362	61.0082
2360	61.154
2358	61.3926
2356	61.6121
2354	61.7999
2352	61.902
2350	61.9355
2348	61.9217
2346	61.8673
2344	61.8075
2342	61.7439
2340	61.7047
2338	61.6931
2336	61.7286
2334	61.8076
2332	61.9231
2330	62.0645
2328	62.2107
2326	62.36
2324	62.507
2322	62.6465
2320	62.7802
2318	62.901
2316	63.0107
2314	63.1092
2312	63.1947
2310	63.2707
2308	63.3389
2306	63.3994
2304	63.4537
2302	63.5019
2300	63.5457
2298	63.5834
2296	63.6183
2294	63.647
2292	63.6712
2290	63.6891
2288	63.6999
2286	63.7041
2284	63.7011
2282	63.6907
2280	63.6748
2278	63.6533
2276	63.6298
2274	63.6078
2272	63.5872
2270	63.5681
2268	63.5522
2266	63.5378
2264	63.5231
2262	63.5117
2260	63.4965
2258	63.4828
2256	63.4653
2254	63.4475
2252	63.4278
2250	63.4078
2248	63.384
2246	63.3583
2244	63.3271
2242	63.2939
2240	63.2587
2238	63.2216
2236	63.1842
2234	63.1484
2232	63.1123
2230	63.0778
2228	63.043
2226	63.0081
2224	62.9746
2222	62.941
2220	62.9088
2218	62.8765
2216	62.844
2214	62.8095
2212	62.7731
2210	62.7348
2208	62.6945
2206	62.6558
2204	62.6169
2202	62.5779
2200	62.5404
2198	62.5044
2196	62.4683
2194	62.4354
2192	62.4024
2190	62.3727
2188	62.3428
2186	62.3127
2184	62.2808
2182	62.2452
2180	62.2078
2178	62.1685
2176	62.1273
2174	62.0894
2172	62.0514
2170	62.0115
2168	61.9732
2166	61.9296
2164	61.8875
2162	61.842
2160	61.798
2158	61.7539
2156	61.7114
2154	61.6705
2152	61.6312
2150	61.5918
2148	61.5539
2146	61.516
2144	61.478
2142	61.4398
2140	61.3999
2138	61.3598
2136	61.3214
2134	61.2829
2132	61.2459
2130	61.2123
2128	61.1786
2126	61.1483
2124	61.1195
2122	61.0907
2120	61.0618
2118	61.0327
2116	61.0036
2114	60.9779
2112	60.952
2110	60.9278
2108	60.9052
2106	60.8842
2104	60.8614
2102	60.8403
2100	60.8191
2098	60.7995
2096	60.7815
2094	60.7669
2092	60.7539
2090	60.7425
2088	60.7344
2086	60.728
2084	60.7214
2082	60.7149
2080	60.7082
2078	60.6982
2076	60.688
2074	60.6745
2072	60.6609
2070	60.6472
2068	60.6386
2066	60.635
2064	60.6363
2062	60.641
2060	60.649
2058	60.6553
2056	60.6631
2054	60.6693
2052	60.6754
2050	60.6832
2048	60.6909
2046	60.7003
2044	60.7113
2042	60.7256
2040	60.7415
2038	60.7591
2036	60.78
2034	60.8025
2032	60.8249
2030	60.8491
2028	60.8731
2026	60.8972
2024	60.9229
2022	60.9535
2020	60.9875
2018	61.0247
2016	61.0652
2014	61.1091
2012	61.1545
2010	61.1983
2008	61.2371
2006	61.2741
2004	61.3046
2002	61.3333
2000	61.3604
1998	61.3892
1996	61.4229
1994	61.4649
1992	61.5135
1990	61.572
1988	61.6387
1986	61.7054
1984	61.7688
1982	61.8223
1980	61.8659
1978	61.9012
1976	61.93
1974	61.9605
1972	61.9926
1970	62.0313
1968	62.075
1966	62.1237
1964	62.1773
1962	62.2292
1960	62.2796
1958	62.3234
1956	62.364
1954	62.3964
1952	62.4256
1950	62.4516
1948	62.4809
1946	62.5201
1944	62.5692
1942	62.633
1940	62.7017
1938	62.7689
1936	62.8247
1934	62.8658
1932	62.894
1930	62.9092
1928	62.9213
1926	62.9302
1924	62.9457
1922	62.9678
1920	63.0031
1918	63.0498
1916	63.1048
1914	63.1663
1912	63.223
1910	63.2782
1908	63.3237
1906	63.3613
1904	63.3876
1902	63.4059
1900	63.4179
1898	63.4251
1896	63.4341
1894	63.4449
1892	63.4639
1890	63.4896
1888	63.525
1886	63.559
1884	63.5867
1882	63.6
1880	63.5973
1878	63.5819
1876	63.557
1874	63.5307
1872	63.5078
1870	63.4997
1868	63.5128
1866	63.5504
1864	63.6094
1862	63.6611
1860	63.7059
1858	63.7166
1856	63.7
1854	63.6692
1852	63.6284
1850	63.5951
1848	63.5707
1846	63.555
1844	63.5495
1842	63.5525
1840	63.556
1838	63.5585
1836	63.5552
1834	63.5414
1832	63.5284
1830	63.5244
1828	63.5341
1826	63.5673
1824	63.6065
1822	63.6502
1820	63.6759
1818	63.6947
1816	63.6874
1814	63.6615
1812	63.6249
1810	63.5746
1808	63.5184
1806	63.4547
1804	63.3884
1802	63.3227
1800	63.2655
1798	63.2201
1796	63.1897
1794	63.171
1792	63.1593
1790	63.148
1788	63.1293
1786	63.0997
1784	63.0449
1782	62.9713
1780	62.8659
1778	62.7513
1776	62.6387
1774	62.5474
1772	62.4918
1770	62.4527
1768	62.4285
1766	62.387
1764	62.3249
1762	62.2373
1760	62.121
1758	61.9824
1756	61.8166
1754	61.6349
1752	61.4341
1750	61.2383
1748	61.0458
1746	60.8617
1744	60.6873
1742	60.5083
1740	60.3246
1738	60.128
1736	59.9202
1734	59.6947
1732	59.4531
1730	59.1855
1728	58.8872
1726	58.5434
1724	58.1591
1722	57.7243
1720	57.2601
1718	56.7682
1716	56.2711
1714	55.7771
1712	55.2957
1710	54.8337
1708	54.3665
1706	53.8958
1704	53.3841
1702	52.8281
1700	52.2359
1698	51.6237
1696	51.0323
1694	50.478
1692	49.9282
1690	49.3763
1688	48.7587
1686	48.0851
1684	47.3717
1682	46.6316
1680	45.9269
1678	45.2298
1676	44.5305
1674	43.824
1672	43.0842
1670	42.3553
1668	41.6437
1666	40.9742
1664	40.3484
1662	39.7565
1660	39.1855
1658	38.6139
1656	38.0237
1654	37.4429
1652	36.8862
1650	36.4228
1648	36.0856
1646	35.8435
1644	35.695
1642	35.5743
1640	35.4896
1638	35.4673
1636	35.5109
1634	35.6616
1632	35.9014
1630	36.2121
1628	36.5922
1626	37.0187
1624	37.5295
1622	38.1496
1620	38.8905
1618	39.7723
1616	40.742
1614	41.7783
1612	42.8316
1610	43.8769
1608	44.9127
1606	45.9354
1604	46.9502
1602	47.9619
1600	48.9506
1598	49.9163
1596	50.829
1594	51.6921
1592	52.4838
1590	53.2107
1588	53.8712
1586	54.4768
1584	55.0357
1582	55.5578
1580	56.0565
1578	56.5366
1576	56.9914
1574	57.4227
1572	57.8187
1570	58.1794
1568	58.4998
1566	58.7931
1564	59.0626
1562	59.34
1560	59.6469
1558	59.9798
1556	60.3472
1554	60.6625
1552	60.9106
1550	61.0649
1548	61.1154
1546	61.157
1544	61.1946
1542	61.3164
1540	61.5258
1538	61.7494
1536	61.9791
1534	62.1331
1532	62.2231
1530	62.2725
1528	62.2895
1526	62.3191
1524	62.3579
1522	62.4092
1520	62.4764
1518	62.5561
1516	62.6466
1514	62.7513
1512	62.8634
1510	62.9862
1508	63.1099
1506	63.2326
1504	63.3461
1502	63.4471
1500	63.5355
1498	63.613
1496	63.6746
1494	63.7308
1492	63.7418
1490	63.7118
1488	63.6362
1486	63.5207
1484	63.4022
1482	63.2814
1480	63.1867
1478	63.1171
1476	63.096
1474	63.1188
1472	63.1926
1470	63.2962
1468	63.3826
1466	63.4489
1464	63.4465
1462	63.4138
1460	63.3793
1458	63.3696
1456	63.4276
1454	63.5112
1452	63.6095
1450	63.6822
1448	63.7105
1446	63.7054
1444	63.667
1442	63.61
1440	63.5344
1438	63.4532
1436	63.3648
1434	63.2804
1432	63.2035
1430	63.1306
1428	63.0649
1426	63.0001
1424	62.9392
1422	62.8937
1420	62.8634
1418	62.8564
1416	62.863
1414	62.8605
1412	62.8473
1410	62.8025
1408	62.7388
1406	62.6596
1404	62.5777
1402	62.5061
1400	62.4448
1398	62.4016
1396	62.3735
1394	62.3651
1392	62.3621
1390	62.361
1388	62.3507
1386	62.3279
1384	62.2943
1382	62.2529
1380	62.2119
1378	62.1696
1376	62.1293
1374	62.0924
1372	62.0591
1370	62.034
1368	62.022
1366	62.0248
1364	62.0437
1362	62.0773
1360	62.1239
1358	62.1754
1356	62.2303
1354	62.282
1352	62.3194
1350	62.3424
1348	62.343
1346	62.3373
1344	62.3316
1342	62.3371
1340	62.3634
1338	62.401
1336	62.4529
1334	62.5047
1332	62.5532
1330	62.5937
1328	62.6228
1326	62.6421
1324	62.6517
1322	62.666
1320	62.6849
1318	62.7227
1316	62.7811
1314	62.8569
1312	62.9468
1310	63.0412
1308	63.14
1306	63.2338
1304	63.3208
1302	63.3946
1300	63.4553
1298	63.5044
1296	63.542
1294	63.5727
1292	63.5966
1290	63.6153
1288	63.6335
1286	63.6513
1284	63.6669
1282	63.6821
1280	63.6951
1278	63.706
1276	63.7131
1274	63.7164
1272	63.716
1270	63.7118
1268	63.6948
1266	63.6764
1264	63.651
1262	63.617
1260	63.5792
1258	63.5361
1256	63.4941
1254	63.4531
1252	63.4163
1250	63.3854
1248	63.3636
1246	63.346
1244	63.3344
1242	63.3224
1240	63.3099
1238	63.2972
1236	63.2841
1234	63.2707
1232	63.257
1230	63.243
1228	63.2304
1226	63.2192
1224	63.2078
1222	63.1962
1220	63.1861
1218	63.1759
1216	63.1671
1214	63.1567
1212	63.1463
1210	63.1389
1208	63.13
1206	63.1275
1204	63.1281
1202	63.1334
1200	63.1451
1198	63.1616
1196	63.1814
1194	63.2028
1192	63.226
1190	63.251
1188	63.2746
1186	63.3
1184	63.3226
1182	63.3454
1180	63.3671
1178	63.3859
1176	63.4052
1174	63.4232
1172	63.4402
1170	63.4607
1168	63.4786
1166	63.4969
1164	63.5143
1162	63.5322
1160	63.5491
1158	63.5682
1156	63.591
1154	63.616
1152	63.6401
1150	63.6649
1148	63.6827
1146	63.6951
1144	63.7028
1142	63.6996
1140	63.6862
1138	63.6643
1136	63.6337
1134	63.5977
1132	63.5576
1130	63.515
1128	63.4731
1126	63.4363
1124	63.4032
1122	63.3767
1120	63.3554
1118	63.3392
1116	63.325
1114	63.3189
1112	63.3194
1110	63.3264
1108	63.3416
1106	63.3616
1104	63.3836
1102	63.4043
1100	63.4238
1098	63.4405
1096	63.4513
1094	63.4592
1092	63.4612
1090	63.4588
1088	63.4504
1086	63.4376
1084	63.4203
1082	63.3985
1080	63.3737
1078	63.3475
1076	63.3214
1074	63.2999
1072	63.2846
1070	63.277
1068	63.2786
1066	63.2862
1064	63.2985
1062	63.3168
1060	63.338
1058	63.3623
1056	63.391
1054	63.4226
1052	63.4601
1050	63.5036
1048	63.5515
1046	63.6006
1044	63.6449
1042	63.6797
1040	63.6989
1038	63.7055
1036	63.701
1034	63.6856
1032	63.6637
1030	63.6325
1028	63.586
1026	63.5242
1024	63.4454
1022	63.3528
1020	63.248
1018	63.1416
1016	63.0337
1014	62.9426
1012	62.8714
1010	62.8339
1008	62.8331
1006	62.8674
1004	62.9384
1002	63.0339
1000	63.1538
998	63.2751
996	63.3964
994	63.4963
992	63.5794
990	63.6396
988	63.6815
986	63.7084
984	63.7252
982	63.7337
980	63.7376
978	63.7406
976	63.7421
974	63.7444
972	63.7465
970	63.7491
968	63.7479
966	63.7459
964	63.7399
962	63.7296
960	63.7193
958	63.7098
956	63.7024
954	63.698
952	63.6964
950	63.6974
948	63.6978
946	63.6975
944	63.6967
942	63.695
940	63.6964
938	63.6974
936	63.6979
934	63.6964
932	63.6925
930	63.6874
928	63.6807
926	63.672
924	63.664
922	63.6532
920	63.6378
918	63.6209
916	63.5961
914	63.5664
912	63.5318
910	63.4955
908	63.4575
906	63.416
904	63.3697
902	63.3183
900	63.2605
898	63.1976
896	63.1281
894	63.0519
892	62.9707
890	62.8844
888	62.7914
886	62.6933
884	62.59
882	62.4816
880	62.3695
878	62.2555
876	62.141
874	62.0214
872	61.8981
870	61.7647
868	61.6292
866	61.4916
864	61.3536
862	61.2184
860	61.0795
858	60.9353
856	60.7857
854	60.6258
852	60.4605
850	60.2897
848	60.1168
846	59.945
844	59.7726
842	59.6013
840	59.4262
838	59.2472
836	59.071
834	58.8975
832	58.7301
830	58.5704
828	58.4102
826	58.2512
824	58.0933
822	57.9366
820	57.7777
818	57.62
816	57.4517
814	57.2812
812	57.1068
810	56.9302
808	56.7548
806	56.5804
804	56.4072
802	56.2351
800	56.0692
798	55.9029
796	55.7342
794	55.56
792	55.3801
790	55.1963
788	55.0101
786	54.8269
784	54.6481
782	54.4825
780	54.3266
778	54.1857
776	54.0615
774	53.9506
772	53.8514
770	53.7587
768	53.6709
766	53.5828
764	53.4909
762	53.3917
760	53.287
758	53.1802
756	53.0747
754	52.9724
752	52.8749
750	52.7806
748	52.6895
746	52.6015
744	52.5132
742	52.4246
740	52.3357
738	52.2429
736	52.1498
734	52.0528
732	51.9573
730	51.8632
728	51.7758
726	51.6935
724	51.6233
722	51.5653
720	51.5106
718	51.4628
716	51.4148
714	51.3648
712	51.3164
710	51.2677
708	51.2207
706	51.177
704	51.135
702	51.0963
700	51.0593
698	51.0239
696	50.9937
694	50.9652
692	50.942
690	50.9186
688	50.8987
686	50.8769
684	50.8567
682	50.8364
680	50.8178
678	50.7954
676	50.7747
674	50.7575
672	50.7513
670	50.7615
668	50.7882
666	50.8224
664	50.8657
662	50.9017
660	50.934
658	50.9589
656	50.9819
654	51.003
652	51.0241
650	51.047
648	51.0736
646	51.1096
644	51.1512
642	51.2022
640	51.2589
638	51.3213
636	51.38
634	51.4388
632	51.4863
630	51.5263
628	51.555
626	51.5741
624	51.5894
622	51.599
620	51.6123
618	51.6331
616	51.6654
614	51.7111
612	51.7664
610	51.8294
608	51.8906
606	51.9518
604	52.0074
602	52.0611
600	52.1109
598	52.1589
596	52.2031
594	52.2453
592	52.2876
590	52.3318
588	52.3799
586	52.432
584	52.4939
582	52.5578
580	52.6296
578	52.7035
576	52.7814
574	52.8633
572	52.9512
570	53.0452
568	53.1453
566	53.2475
564	53.3559
562	53.4624
560	53.5672
558	53.6701
556	53.7693
554	53.8587
552	53.9442
550	54.0239
548	54.0977
546	54.1697
544	54.2417
542	54.3138
540	54.388
538	54.4643
536	54.5488
534	54.6435
532	54.7485
530	54.8678
528	54.9954
526	55.1273
524	55.2574
522	55.3837
520	55.5001
518	55.6045
516	55.7009
514	55.7851
512	55.8777
510	55.9787
508	56.1044
506	56.2509
504	56.4141
502	56.59
500	56.7601
498	56.9265
496	57.0787
494	57.2187
492	57.3425
490	57.4478
488	57.5387
486	57.6153
484	57.6835
482	57.7456
480	57.8036
478	57.8616
476	57.9239
474	57.9883
472	58.057
470	58.13
468	58.2051
466	58.2973
464	58.4044
462	58.5391
460	58.7016
458	58.8878
456	59.0956
454	59.3082
452	59.5233
450	59.7218
448	59.8993
446	60.0474
444	60.1679
442	60.28
440	60.388
438	60.5177
436	60.6584
434	60.7972
432	60.9276
430	61.0302
428	61.1221
426	61.2185
424	61.3345
422	61.5007
420	61.7108
418	61.9779
416	62.2805
414	62.6165
412	62.9205
410	63.177
408	63.3509
406	63.4218
404	63.4753
[truncated: 2 more rows]

## Sheet: UV_Vis
Wavelength_nm	Absorbance
800	-0.673687
799	-0.672711
798	-0.673236
797	-0.672319
796	-0.674522
795	-0.673853
794	-0.673905
793	-0.673959
792	-0.673447
791	-0.67366
790	-0.67363
789	-0.672637
788	-0.671412
787	-0.672235
786	-0.672413
785	-0.67202
784	-0.671721
783	-0.671475
782	-0.671243
781	-0.670672
780	-0.670384
779	-0.67043
778	-0.670468
777	-0.67006
776	-0.670222
775	-0.669857
774	-0.670383
773	-0.670336
772	-0.670428
771	-0.670431
770	-0.671262
769	-0.671635
768	-0.671647
767	-0.673582
766	-0.672976
765	-0.673969
764	-0.674797
763	-0.675642
762	-0.675719
761	-0.676949
760	-0.676771
759	-0.677318
758	-0.677141
757	-0.676957
756	-0.676329
755	-0.675505
754	-0.676326
753	-0.675884
752	-0.675793
751	-0.675701
750	-0.675939
749	-0.675827
748	-0.675682
747	-0.675915
746	-0.675898
745	-0.67644
744	-0.676464
743	-0.675068
742	-0.675828
741	-0.676097
740	-0.676021
739	-0.675932
738	-0.676476
737	-0.676837
736	-0.677094
735	-0.676979
734	-0.677217
733	-0.677759
732	-0.677923
731	-0.6784
730	-0.677652
729	-0.678692
728	-0.678466
727	-0.677512
726	-0.677825
725	-0.678278
724	-0.679275
723	-0.678386
722	-0.678732
721	-0.678612
720	-0.679276
719	-0.679654
718	-0.676733
717	-0.676483
716	-0.676176
715	-0.675087
714	-0.675545
713	-0.675954
712	-0.676199
711	-0.67705
710	-0.676284
709	-0.676746
708	-0.676044
707	-0.676797
706	-0.676768
705	-0.676918
704	-0.676954
703	-0.677146
702	-0.677512
701	-0.676688
700	-0.67762
699	-0.678605
698	-0.678499
697	-0.67831
696	-0.67851
695	-0.678859
694	-0.678547
693	-0.678359
692	-0.678077
691	-0.678789
690	-0.679152
689	-0.678296
688	-0.678192
687	-0.67863
686	-0.678998
685	-0.678531
684	-0.678569
683	-0.678965
682	-0.679225
681	-0.679054
680	-0.678943
679	-0.679014
678	-0.678935
677	-0.678589
676	-0.679738
675	-0.679623
674	-0.679613
673	-0.679975
672	-0.68056
671	-0.681634
670	-0.682012
669	-0.681457
668	-0.68151
667	-0.682346
666	-0.682902
665	-0.683716
664	-0.683021
663	-0.684005
662	-0.68411
661	-0.684254
660	-0.684172
659	-0.684365
658	-0.684804
657	-0.68438
656	-0.683752
655	-0.683638
654	-0.684103
653	-0.684801
652	-0.684812
651	-0.685131
650	-0.685594
649	-0.68602
648	-0.685711
647	-0.686361
646	-0.68661
645	-0.686875
644	-0.68668
643	-0.686433
642	-0.686359
641	-0.686487
640	-0.686175
639	-0.686153
638	-0.686524
637	-0.686225
636	-0.686291
635	-0.686118
634	-0.686607
633	-0.687274
632	-0.687395
631	-0.687723
630	-0.688471
629	-0.688728
628	-0.689054
627	-0.689709
626	-0.69044
625	-0.689912
624	-0.690223
623	-0.690245
622	-0.690184
621	-0.690267
620	-0.691168
619	-0.690523
618	-0.691131
617	-0.691946
616	-0.692186
615	-0.692136
614	-0.692101
613	-0.693532
612	-0.693534
611	-0.693548
610	-0.693682
609	-0.693954
608	-0.69478
607	-0.69466
606	-0.694547
605	-0.694736
604	-0.695322
603	-0.695075
602	-0.695918
601	-0.695837
600	-0.695755
599	-0.696868
598	-0.696858
597	-0.697303
596	-0.697245
595	-0.697638
594	-0.697229
593	-0.697824
592	-0.699271
591	-0.698433
590	-0.698043
589	-0.699126
588	-0.699313
587	-0.69928
586	-0.699499
585	-0.699201
584	-0.699429
583	-0.699171
582	-0.698737
581	-0.698918
580	-0.698084
579	-0.698724
578	-0.698332
577	-0.699155
576	-0.697746
575	-0.698347
574	-0.697954
573	-0.698665
572	-0.69856
571	-0.698921
570	-0.698879
569	-0.698539
568	-0.697398
567	-0.69707
566	-0.697511
565	-0.697163
564	-0.697021
563	-0.697373
562	-0.697721
561	-0.696925
560	-0.697259
559	-0.696679
558	-0.696652
557	-0.696828
556	-0.696576
555	-0.696372
554	-0.696132
553	-0.696204
552	-0.695484
551	-0.696125
550	-0.696004
549	-0.695188
548	-0.695617
547	-0.695271
546	-0.695191
545	-0.694832
544	-0.694336
543	-0.693385
542	-0.693949
541	-0.693051
540	-0.692403
539	-0.692053
538	-0.691692
537	-0.690482
536	-0.689602
535	-0.689435
534	-0.689294
533	-0.687177
532	-0.6873
531	-0.68767
530	-0.68835
529	-0.688474
528	-0.687289
527	-0.687652
526	-0.687078
525	-0.687373
524	-0.686362
523	-0.685859
522	-0.684812
521	-0.68507
520	-0.68453
519	-0.683461
518	-0.682857
517	-0.681524
516	-0.680484
515	-0.679885
514	-0.67974
513	-0.679705
512	-0.678659
511	-0.678005
510	-0.677724
509	-0.677823
508	-0.677215
507	-0.67764
506	-0.67706
505	-0.676367
504	-0.675073
503	-0.674957
502	-0.6744
501	-0.673341
500	-0.673982
499	-0.672655
498	-0.672394
497	-0.671429
496	-0.670052
495	-0.670385
494	-0.669785
493	-0.668933
492	-0.668291
491	-0.667901
490	-0.667021
489	-0.665528
488	-0.664805
487	-0.664246
486	-0.663306
485	-0.662658
484	-0.660952
483	-0.66021
482	-0.659695
481	-0.658316
480	-0.65745
479	-0.655213
478	-0.654302
477	-0.65386
476	-0.652177
475	-0.650778
474	-0.649967
473	-0.649455
472	-0.647862
471	-0.646486
470	-0.644894
469	-0.64419
468	-0.642183
467	-0.640471
466	-0.637588
465	-0.63703
464	-0.635713
463	-0.6341
462	-0.632294
461	-0.631343
460	-0.629577
459	-0.628596
458	-0.627058
457	-0.624913
456	-0.623568
455	-0.62161
454	-0.62
453	-0.618763
452	-0.616317
451	-0.613945
450	-0.612124
449	-0.609759
448	-0.607201
447	-0.604567
446	-0.601996
445	-0.599711
444	-0.597925
443	-0.594931
442	-0.592874
441	-0.59123
440	-0.58826
439	-0.586091
438	-0.583338
437	-0.580469
436	-0.577501
435	-0.574672
434	-0.571746
433	-0.569119
432	-0.565165
431	-0.562157
430	-0.559294
429	-0.555834
428	-0.551798
427	-0.549105
426	-0.545469
425	-0.541201
424	-0.538145
423	-0.534809
422	-0.531546
421	-0.528443
420	-0.525194
419	-0.521329
418	-0.517787
417	-0.513871
416	-0.509995
415	-0.506367
414	-0.502291
413	-0.498705
412	-0.494573
411	-0.490016
410	-0.486088
409	-0.481757
408	-0.476699
407	-0.472365
406	-0.467903
405	-0.461693
404	-0.45768
403	-0.452794
402	-0.447872
401	-0.442171
400	-0.437927
399	-0.431669
398	-0.426262
397	-0.421138
396	-0.415882
395	-0.41071
394	-0.40576
393	-0.400264
392	-0.394055
391	-0.388231
390	-0.383148
389	-0.377432
388	-0.372687
387	-0.366863
386	-0.360331
385	-0.356131
384	-0.350073
383	-0.343923
382	-0.337774
381	-0.330142
380	-0.322815
379	-0.315282
378	-0.305653
377	-0.298443
376	-0.289656
375	-0.280877
374	-0.272588
373	-0.263672
372	-0.254893
371	-0.246974
370	-0.238783
369	-0.227453
368	-0.210042
367	-0.207204
366	-0.19732
365	-0.188863
364	-0.176601
363	-0.16775
362	-0.158048
361	-0.148236
360	-0.134127
359	-0.125026
358	-0.114325
357	-0.101729
356	-0.0929073
355	-0.0781295
354	-0.0702232
353	-0.0577213
352	-0.0435516
351	-0.0342797
350	-0.017725
349	-0.0066564
348	0.0136709
347	0.0243442
346	0.0387204
345	0.0554897
344	0.0699785
343	0.0847006
342	0.100315
341	0.117485
340	0.131311
339	0.149952
338	0.165591
337	0.182039
336	0.198711
335	0.21482
334	0.232719
333	0.2496
332	0.266094
331	0.284813
330	0.301118
329	0.31651
328	0.334491
327	0.350903
326	0.36686
325	0.385641
324	0.402943
323	0.416114
322	0.431193
321	0.445919
320	0.459217
319	0.472991
318	0.48372
317	0.499015
316	0.51006
315	0.521897
314	0.537173
313	0.547577
312	0.560489
311	0.574445
310	0.583841
309	0.594763
308	0.613751
307	0.615661
306	0.624535
305	0.629913
304	0.640136
303	0.643517
302	0.652361
301	0.663495
300	0.664012
299	0.663765
298	0.670052
297	0.671588
296	0.674416
295	0.680572
294	0.668012
293	0.657622
292	0.648425
291	0.630513
290	0.590557
289	0.543423
288	0.494545
287	0.43097
286	0.361234
285	0.2922
284	0.217579
283	0.164858
282	0.16294
281	0.138814
280	0.128473
279	0.127668
278	0.12229
277	0.111807
276	0.116115
275	0.142327
274	0.137061
273	0.0928808
272	0.121332
271	0.12175
270	0.0972022
269	0.112741
268	0.106325
267	0.130937
266	0.118761
265	0.121391
264	0.0932025
263	0.0988894
262	0.103615
261	0.119581
260	0.0859285
259	0.12133
258	0.10872
257	0.121508
256	0.130937
255	0.151575
254	0.150072
253	0.130206
252	0.15075
251	0.14528
250	0.141089
249	0.16777
248	0.178072
247	0.181891
246	0.179193
245	0.170793
244	0.195674
243	0.180723
242	0.207193
241	0.207865
240	0.227999
239	0.206412
238	0.211509
237	0.212807
236	0.228937
235	0.223543
234	0.21938
233	0.228154
232	0.216405
231	0.231408
230	0.22904
229	0.219181
228	0.224599
227	0.22461
226	0.214608
225	0.231146
224	0.228002
223	0.219458
222	0.209785
221	0.217234
220	0.197339
219	0.185411
218	0.173774
217	0.181831
216	0.172769
215	0.129499
214	0.155582
213	0.138746
212	0.137271
211	0.113413
210	0.113851
209	0.110863
208	0.0589303
207	0.0528509
206	0.0489388
205	0.0605927
204	0.0505236
203	0.00504745
202	0.0235781
201	0.00331729
200	0.0123432

## Sheet: Fluorescence
290	42.843
290.5	42.92
291	42.824
291.5	42.641
292	42.239
292.5	41.518
293	41.113
293.5	40.073
294	38.826
294.5	37.643
295	35.966
295.5	33.363
296	31.556
296.5	29.207
297	27.2
297.5	25.125
298	23.064
298.5	21.278
299	19.371
299.5	17.39
300	15.888	87.528
300.5	14.453	86.692
301	12.872	85.022
301.5	11.51	83.712
302	10.804	82.87
302.5	9.608	79.917
303	9.024	76.67
303.5	8.451	73.241
304	7.802	69.434
304.5	7.576	65.796
305	7.256	62.235
305.5	7.248	57.274
306	7.295	53.166
306.5	7.219	49.379
307	7.409	44.246
307.5	7.434	39.737
308	7.555	35.76
308.5	7.672	32.59
309	8.166	28.845
309.5	8.582	25.687
310	8.677	22.826	116.472
310.5	8.745	19.748	114.921
311	9.181	16.937	112.192
311.5	9.277	15.093	109.225
312	9.644	13.343	105.602
312.5	9.914	11.903	101.172
313	10.161	10.459	96.04
313.5	10.284	9.456	91.134
314	10.333	8.823	85.407
314.5	10.637	8.057	79.633
315	10.742	7.683	73.812
315.5	11.117	7.294	67.72
316	11.44	7.13	61.993
316.5	11.436	6.858	56.021
317	11.643	7.076	50.365
317.5	11.949	6.983	45.273
318	11.706	7.09	40.271
318.5	12.125	7.153	35.371
319	12.498	7.183	30.835
319.5	12.6	7.254	26.715
320	12.435	7.715	22.26	115.955
320.5	12.947	8.12	19.244	114.586
321	12.989	8.169	16.691	110.679
321.5	13.17	8.241	14.324	106.912
322	13.253	8.278	12.159	102.338
322.5	13.391	8.591	10.552	96.73
323	13.494	8.646	9.129	91.167
323.5	13.465	8.791	8.199	85.144
324	13.668	9.078	7.135	78.757
324.5	13.721	9.222	6.585	72.848
325	13.892	9.563	6.334	67.186
325.5	13.752	9.714	5.878	61.401
326	13.844	10.015	5.727	55.343
326.5	14.187	10.15	5.632	49.624
327	14.193	10.195	5.676	44.569
327.5	14.522	10.486	5.627	39.475
328	14.491	10.816	5.647	34.575
328.5	14.667	11.103	5.869	29.842
329	15.187	11.26	6.183	25.67
329.5	15.206	11.326	6.25	21.926
330	15.244	11.71	6.463	18.972	110.945
330.5	15.513	12.043	6.527	16.324	110.119
331	15.399	12.261	6.883	14.036	105.679
331.5	15.765	12.451	7.182	11.874	100.687
332	16.15	12.818	7.547	10.236	95.954
332.5	16.388	13.023	7.622	8.932	91.084
333	16.416	13.634	7.915	7.86	85.704
333.5	16.859	13.513	8.197	7.056	80.654
334	16.912	13.89	8.418	6.445	75.14
334.5	17.054	14.298	8.873	6.113	69.631
335	17.388	14.498	9.164	5.891	63.858
335.5	17.999	15.031	9.263	5.723	58.113
336	17.876	15.248	9.71	5.663	53.315
336.5	18.228	15.447	10.089	5.653	47.574
337	18.518	15.91	10.339	5.777	42.856
337.5	18.745	16.203	10.644	5.827	37.29
338	19.493	16.284	10.96	5.958	33.522
338.5	19.182	16.693	11.432	6.15	29.417
339	19.679	17.35	11.82	6.258	26.037
339.5	20.02	17.586	12.062	6.56	22.763
340	20.319	18.064	12.282	6.739	19.407	156.949
340.5	20.699	18.243	12.682	7.146	16.712	153.869
341	20.712	18.528	13.025	7.444	14.573	148.201
341.5	21.207	18.449	13.297	7.54	12.69	142.422
342	21.629	18.981	13.804	7.767	11.231	135.454
342.5	22.028	19.595	14.011	8.187	9.704	127.161
343	21.965	19.876	14.354	8.507	8.743	118.642
343.5	22.632	20.317	14.769	8.81	7.996	110.334
344	22.968	20.326	15.099	9.139	7.35	101.831
344.5	23.303	20.699	15.365	9.29	6.9	93.415
345	23.356	21.12	15.603	9.679	6.68	84.928
345.5	23.586	21.763	15.94	9.933	6.537	76.679
346	24.099	22.272	16.413	10.24	6.45	69.206
346.5	24.314	22.344	16.562	10.592	6.525	62.848
347	24.818	22.375	16.869	10.767	6.676	56.238
347.5	24.937	22.826	17.241	10.918	6.738	49.778
348	25.531	23.47	17.507	11.267	6.831	44.22
348.5	25.413	23.606	17.605	11.635	6.981	38.111
349	26.169	23.89	18.159	12.027	7.17	32.897
349.5	26.16	24.177	18.607	12.378	7.366	28.481
350	26.442	24.513	18.784	12.605	7.558	24.526	271.687
350.5	26.728	24.979	19.056	13.062	7.765	21.284	268.533
351	26.905	25.076	19.163	13.286	8.086	18.342	259.798
351.5	27.21	25.584	19.58	13.513	8.541	15.763	248.243
352	27.59	26.368	20.105	13.607	8.738	13.515	232.921
352.5	28.187	26.5	20.493	14.211	8.975	11.961	218.274
353	28.713	26.591	20.663	14.626	9.17	10.865	205.146
353.5	28.812	27.004	21.031	14.977	9.385	9.952	190.622
354	28.586	27.47	21.36	15.2	9.603	9.223	175.752
354.5	29.289	27.758	21.673	15.543	10.051	8.8	159.716
355	29.659	28.095	22.107	16.026	10.314	8.623	145.227
355.5	30.328	28.475	22.504	16.513	10.998	8.389	130.931
356	30.501	29.227	23.103	16.761	11.297	8.425	118.594
356.5	30.586	29.086	23.205	17.028	11.579	8.465	105.96
357	30.914	29.696	23.6	17.27	11.792	8.65	93.16
357.5	30.984	30.122	23.95	17.87	12.255	8.749	82.219
358	31.918	30.223	24.554	18.178	12.598	9.009	70.635
358.5	31.766	30.505	25.002	18.641	13.036	9.291	60.742
359	32.144	31.18	25.207	19.004	13.388	9.677	51.769
359.5	32.546	31.239	25.547	19.53	13.957	9.917	44.648
360	32.73	31.585	26.007	19.923	14.373	10.294	36.975	416.089
360.5	33.238	32.071	26.683	20.3	14.765	10.555	30.621	403.456
361	33.491	32.313	27.034	20.686	15.198	10.994	25.961	382.72
361.5	33.907	32.615	27.54	21.234	15.635	11.452	22.08	361.906
362	34.819	33.061	27.808	21.895	16.137	11.712	18.985	338.44
362.5	34.875	33.515	28.294	22.245	16.671	12.061	16.642	317.056
363	34.948	33.824	28.519	22.741	17.093	12.534	14.845	291.747
363.5	35.23	33.864	28.962	22.897	17.601	12.962	13.566	267.901
364	35.877	34.524	29.533	23.308	18.135	13.384	12.641	243.369
364.5	36.558	35.412	30.187	23.951	18.698	13.937	11.985	218.132
365	36.49	35.695	30.341	24.431	19.218	14.317	11.748	197.815
365.5	36.523	36.327	31.207	24.845	19.669	14.85	11.587	175.336
366	36.99	36.23	31.57	25.628	20.341	15.272	11.625	153.626
366.5	37.751	36.972	32.016	26.445	20.901	16.075	11.867	132.801
367	38.138	37.297	32.719	27.001	21.576	16.7	12.371	112.655
367.5	38.388	37.346	33.383	27.743	22.391	17.235	12.64	97.251
368	38.316	38.036	33.699	28.545	22.945	17.913	12.979	83.227
368.5	39.098	38.257	34.284	28.93	23.453	18.423	13.222	70.347
369	39.38	38.945	34.916	29.631	24.264	19.138	13.768	58.957
369.5	39.928	39.012	35.27	30.537	24.772	19.598	14.229	49.967
370	40.213	39.502	35.98	30.859	25.503	20.215	14.515	41.108	435.864
370.5	40.581	39.806	36.622	31.514	25.786	21.067	15.157	34.642	437.431
371	40.902	40.538	37.187	32.249	26.645	21.646	15.586	29.554	439.103
371.5	40.886	40.808	37.522	33.102	27.454	22.373	15.971	25.403	438.329
372	41.386	41.196	38.073	33.594	27.978	23.222	16.527	22.024	432.976
372.5	42.13	41.879	38.602	34.192	28.799	23.736	17.199	19.251	427.758
373	42.581	42.501	39.244	35.274	29.503	24.54	18.049	17.182	399.212
373.5	42.821	42.578	39.798	35.655	30.657	25.206	18.415	15.774	365.124
374	42.465	43.132	40.578	36.182	31.275	25.835	18.8	14.925	332.644
374.5	43.47	43.472	41.168	37.06	32.172	26.521	19.453	14.501	298.074
375	44.15	44.715	41.895	37.989	32.726	27.267	20.12	14.196	265.814
375.5	43.481	44.43	42.109	38.578	33.201	28.09	20.8	14.107	232.781
376	44.128	45.388	42.938	39.335	34.01	28.756	21.502	14.087	202.951
376.5	44.516	45.263	43.433	40.146	35.155	29.909	22.206	14.439	174.32
377	44.42	45.294	43.866	40.85	35.716	30.316	22.509	14.64	150.927
377.5	45.253	46.046	44.318	41.543	36.374	31.177	23.22	14.907	129.016
378	45.741	46.432	45.077	42.182	37.488	31.928	23.919	15.218	108.437
378.5	45.657	46.821	45.587	42.989	38.212	32.606	24.6	15.612	89.952
379	45.967	47.093	46.138	43.832	38.975	33.403	25.265	15.868	72.902
379.5	46.386	47.19	46.907	44.631	39.479	34.067	26.075	16.036	60.381
380	46.81	47.463	47.294	45.384	40.441	34.909	26.678	16.683	50.067
380.5	46.868	48.123	47.871	46.11	41.053	35.416	27.201	17.186	41.381
381	47.272	49.094	48.423	46.792	42.03	36.432	27.883	17.471	33.748
381.5	47.158	49.447	49.367	47.3	42.903	37.094	28.678	17.882	28.001
382	47.841	49.309	48.977	47.934	43.38	37.619	29.168	18.124	23.339
382.5	48.173	49.748	49.95	48.654	44.026	38.33	29.777	18.666	19.869
383	48.037	49.627	49.931	49.414	45.083	39.139	30.505	19.018	17.087
383.5	48.51	50.222	50.59	50.054	45.926	39.915	30.929	19.431	15.47
384	48.825	50.657	51.174	50.409	46.888	40.533	31.848	20.055	14.08
384.5	49.85	50.999	51.747	50.93	47.741	41.18	32.431	20.436	13.41
385	49.243	51.36	52.212	52.061	48.196	41.996	33.147	20.938	12.854
385.5	49.391	51.631	52.221	52.917	49.19	42.872	33.761	21.047	12.453
386	49.339	51.793	52.975	53.496	49.81	43.368	34.288	21.641	12.479
386.5	49.373	52.334	53.498	54.131	50.175	44.08	34.986	22.158	12.463
387	49.651	52.36	54.084	54.602	50.726	44.783	35.864	22.633	12.371
387.5	50.051	53.037	54.252	55.235	51.263	45.515	36.532	22.847	12.591
388	50.298	52.788	54.543	55.613	52.049	45.875	36.862	23.414	12.829
388.5	50.419	52.735	54.966	56.351	52.996	46.543	37.357	23.991	13.215
389	50.698	53.458	55.566	56.807	53.429	47.378	37.953	24.23	13.348
389.5	50.749	53.418	55.42	57.586	53.908	47.927	38.732	24.486	13.416
390	50.842	54.104	56.067	58.229	54.667	48.439	39.257	25.387	13.848
390.5	50.867	54.003	56.402	58.469	55.455	49.281	40.167	25.72	13.951
391	51.323	54.08	56.774	59.198	56.219	50.081	40.644	26.401	14.202
391.5	51.606	54.776	57.19	59.376	56.916	50.332	41.215	26.631	14.659
392	51.718	54.307	57.594	59.871	57.314	51.151	41.425	27.261	14.959
392.5	51.411	54.67	58.129	60.645	57.732	51.263	42.217	27.628	15.175
393	51.891	55.128	58.062	60.655	58.074	51.951	42.602	28.202	15.496
393.5	51.886	54.832	58.356	61.198	58.571	52.445	43.108	28.655	15.73
394	51.958	54.682	59.111	61.205	59.041	52.677	43.665	29.073	16.175
394.5	51.775	55.579	58.863	61.741	59.23	53.792	44.087	29.329	16.313
395	51.234	55.299	58.889	62.086	59.763	53.646	44.484	29.828	16.437
395.5	51.597	54.95	59.151	62.367	60.246	54.041	44.782	30.185	16.804
396	51.57	54.714	59.329	62.764	60.671	54.723	45.187	30.713	17.439
396.5	51.574	55.383	59.517	63.199	61.069	55.116	45.592	31	17.555
397	51.957	55.497	59.476	62.863	61.131	55.488	45.899	31.639	17.763
397.5	51.525	56.04	59.639	63.326	61.572	56.252	46.024	31.841	17.917
398	52.457	56.12	59.471	63.265	61.908	56.353	46.475	32.59	18.398
398.5	52.006	55.782	59.91	63.121	62.38	56.43	46.873	32.601	18.796
399	51.763	55.81	59.708	63.483	62.359	56.857	47.309	32.978	19.049
399.5	51.906	55.728	60.077	64.203	62.784	57.318	47.479	33.447	19.383
400	51.134	55.406	59.874	64.24	63.012	57.64	47.796	33.847	19.649
400.5	51.428	55.836	59.787	64.353	62.65	57.608	48.22	34.451	20.037
401	51.756	55.922	60.305	64.292	62.747	57.828	48.324	34.609	20.515
401.5	51.456	55.677	59.975	63.934	63.206	58.167	48.639	34.895	20.9
402	51.68	55.831	60.226	64.493	63.363	58.428	48.956	35.376	21.312
402.5	51.57	55.787	60.343	64.366	63.503	58.526	49.557	35.739	21.698
403	51.806	55.491	60.069	64.189	63.674	58.609	49.726	35.866	21.894
403.5	51.611	55.446	60.116	64.326	63.628	58.636	49.654	36.252	22.43
404	51.315	55.184	59.571	64.573	63.819	58.944	50.134	36.464	22.658
404.5	51.242	55.02	59.415	64.447	63.957	59.605	50.337	36.836	23.254
405	50.947	55.074	59.948	64.886	63.681	59.633	50.61	37.201	23.378
405.5	50.579	54.449	60.014	64.648	63.92	59.5	50.569	37.005	23.502
406	50.505	54.634	59.79	64.591	64.115	59.521	50.958	37.551	23.93
406.5	51.02	54.866	59.682	64.18	63.647	59.405	50.785	37.939	24.675
407	50.913	55.123	59.762	64.238	63.849	59.669	51.085	38.191	24.952
407.5	50.531	54.689	59.391	64.035	64.221	59.386	51.361	38.73	25.462
408	50.587	54.424	59.475	64.068	64.219	59.856	51.864	38.55	25.813
408.5	50.371	54.454	59.173	63.569	64.011	59.731	51.531	38.873	26.191
409	50.512	54.205	59.217	63.691	63.801	59.699	51.586	39.314	26.568
409.5	50.06	54.385	58.768	63.549	63.686	59.866	52.103	39.759	26.901
410	49.975	53.941	58.485	63.214	63.368	59.814	52.102	39.688	27.341
410.5	50.449	53.846	58.527	63.509	63.249	60.114	51.968	39.809	27.577
411	50.802	53.968	58.326	62.807	63.945	59.791	52.077	40.15	27.997
411.5	49.415	53.81	58.144	62.707	62.954	59.702	52.47	40.456	28.271
412	49.321	53.328	57.893	62.642	62.282	59.683	52.804	40.462	28.6
412.5	49.37	53.079	57.841	62.84	62.887	59.603	52.914	40.688	28.908
413	49.443	53.102	57.342	62.231	63.003	59.562	53.002	40.955	29.319
413.5	49.25	53.578	57.057	61.791	62.569	59.481	52.757	41.147	29.721
414	49.01	53.749	56.83	61.355	62.212	59.455	52.864	41.481	30.082
414.5	48.788	52.774	56.589	61.096	62.156	59.052	53	41.451	30.402
415	48.494	52.457	56.643	60.808	61.693	58.869	52.568	41.407	30.708
415.5	47.701	52.7	56.593	60.618	61.114	58.589	53.083	41.75	30.983
416	47.949	52.017	56.189	60.929	60.816	58.607	52.728	41.98	31.233
416.5	47.35	51.95	55.685	60.271	60.526	58.597	52.89	42.205	31.506
417	47.648	51.759	55.628	60.092	60.35	58.028	52.903	42.297	31.852
417.5	48.04	51.448	55.28	59.81	60.014	57.943	52.733	42.644	32.031
418	47.508	50.915	55.004	59.518	60.02	57.697	52.886	42.712	32.25
418.5	47.338	51.098	54.983	59.306	59.574	57.842	52.554	42.855	32.727
419	47.542	50.832	54.368	58.943	59.207	57.42	52.105	43.179	33.049
419.5	46.731	50.566	54.33	58.426	59.197	57.249	52.484	43.254	33.333
420	46.773	50.422	54.286	58.062	59.054	57.373	52.386	43.53	33.567
420.5	47.007	49.581	54.24	57.744	58.139	56.907	52.579	43.372	33.697
421	46.497	49.54	53.867	57.669	57.827	56.605	52.741	43.859	33.815
421.5	46.072	49.758	53.363	57.446	58.119	56.29	52.33	43.921	34.041
422	45.919	48.901	53.184	56.91	58.283	55.97	52.144	43.652	34.114
422.5	45.431	48.845	53.262	56.846	57.334	55.756	51.924	43.63	34.486
423	45.327	49.439	52.962	56.151	56.778	55.815	52.016	44.009	34.641
423.5	45.04	49.335	52.537	56.296	56.819	55.288	51.859	43.688	34.836
424	44.706	48.737	51.767	55.526	56.15	54.812	51.543	44.307	34.959
424.5	45.109	48.364	51.472	54.74	55.794	55.235	51.707	43.924	35.292
425	45.008	48.334	51.413	54.659	55.461	54.418	51.754	44.282	35.404
425.5	44.895	47.929	51.235	54.268	55.244	54.315	51.486	44.243	35.622
426	44.231	47.703	51.26	54.226	54.842	54.301	51.321	44.474	36.034
426.5	44.946	47.476	50.622	53.923	54.724	53.676	51.205	44.547	36.114
427	44.601	47.119	50.006	53.655	54.697	53.518	51.425	44.535	36.039
427.5	44.031	47.043	49.886	53.542	54.038	53.418	51.031	44.574	36.201
428	43.876	46.576	49.934	53.275	53.618	52.765	50.888	44.675	36.324
428.5	43.441	46.203	49.581	52.738	53.215	52.61	50.599	44.524	36.633
429	43.568	46.503	48.987	52.595	52.994	52.653	50.859	44.773	36.874
429.5	42.914	46.303	48.833	52.267	52.455	52.193	50.103	44.721	36.851
430	42.712	45.71	48.548	51.351	51.998	51.687	50.026	44.373	36.976
430.5	42.69	45.407	48.426	50.871	51.72	51.288	49.975	44.385	37.163
431	42.518	45.831	47.94	50.446	51.468	51.083	49.598	44.379	37.293
431.5	42.044	44.954	47.627	50.395	50.92	51.094	49.845	44.409	37.341
432	41.961	44.639	47.068	49.722	50.633	50.629	49.231	44.413	37.375
432.5	42.159	44.377	46.934	49.639	50.045	50.436	48.867	44.282	37.121
433	41.406	44.138	46.586	49.435	49.874	49.943	48.877	44.273	37.273
433.5	41.336	43.658	46.372	48.378	49.707	49.937	49.141	44.111	37.312
434	40.898	43.565	46.017	48.866	49.177	49.158	48.699	44.004	37.269
434.5	41.084	43.296	45.536	47.987	48.977	48.269	48.175	43.86	37.744
435	40.709	42.831	45.13	47.672	48.54	48.393	47.91	43.659	37.924
435.5	40.026	42.706	44.57	47.136	48.123	47.724	47.365	43.688	37.973
436	40.2	42.439	44.284	46.792	47.319	47.218	47.242	43.73	37.715
436.5	39.652	42.318	44.499	46.167	46.868	46.832	47.428	43.623	37.646
437	39.598	41.355	43.602	45.871	46.829	46.802	46.698	43.154	37.695
437.5	39.075	41.009	43.586	45.731	46.408	46.559	46.467	43.213	37.85
438	38.684	40.784	42.951	45.095	45.289	46.228	46.507	43.204	37.295
438.5	38.68	40.541	42.527	45.012	45.097	45.811	45.835	42.9	37.26
439	38.35	40.178	42.171	44.095	45.15	45.447	45.43	42.558	37.375
439.5	37.895	39.992	41.882	44.063	44.74	45.308	45.567	42.405	37.221
440	37.863	39.952	41.673	43.644	44.053	44.723	45.14	42.145	37.447
440.5	37.484	39.789	41.062	43.217	43.332	44.355	44.827	41.696	37.363
441	37.382	38.916	40.689	42.546	43.586	43.799	44.4	41.799	36.934
441.5	37.058	38.472	40.595	42.173	43.06	43.445	44.332	42.055	36.942
442	37.371	38.174	40.144	41.588	42.716	43.23	43.842	41.913	37.045
442.5	36.839	38.145	39.829	41.885	42.333	42.841	44.01	41.887	36.888
443	36.71	38.216	39.74	41.558	41.779	42.529	43.709	41.337	37.071
443.5	36.235	38.003	39.414	41.104	41.395	42.456	43.044	41.37	36.935
444	36.077	37.418	39.129	40.52	40.838	42.09	42.669	41.037	36.652
444.5	36.174	37.218	38.675	40.007	40.676	41.541	42.705	41.018	36.471
445	36.004	37.15	38.035	39.976	40.652	41.216	42.444	40.622	36.735
445.5	35.414	36.589	37.741	39.225	39.797	40.793	42.201	40.266	36.508
446	34.878	36.034	37.235	38.743	39.65	40.304	41.914	40.374	36.165
446.5	34.694	35.746	36.812	38.773	39.135	40.416	42.125	40.118	36.318
447	34.694	35.972	36.771	38.405	38.942	40.076	41.987	39.914	36.347
447.5	34.24	35.579	36.743	37.859	38.527	39.715	41.107	39.787	35.944
448	34.264	35.284	36.138	37.658	38.129	39.391	40.849	39.535	36.201
448.5	34.144	35.009	35.967	37.294	37.669	38.782	40.447	39.609	35.571
449	34.379	34.977	36.004	36.782	37.787	38.679	40.454	39.12	35.698
449.5	33.736	33.959	35.303	36.439	37.271	38.577	40.084	38.986	35.374
450	33.452	33.992	34.991	36.324	36.977	38.198	39.621	38.904	35.486
450.5	33.525	33.905	34.904	35.938	36.447	37.54	39.297	38.758	35.399
451	33.132	33.467	34.271	35.756	36.235	37.469	39.304	38.539	35.312
451.5	33.032	33.583	34.114	35.488	36.101	37.316	39.049	38.141	35.024
452	33.07	33.293	34.005	34.797	35.377	36.616	39.064	37.893	35.169
452.5	32.86	32.529	33.56	34.641	35.05	36.71	38.627	37.828	34.775
453	32.586	32.534	33.431	34.316	34.698	36.338	38.406	37.879	34.67
453.5	32.463	32.51	33.024	34.086	34.577	35.809	38.316	37.392	34.687
454	32.309	31.962	32.769	33.489	33.959	35.855	38.037	36.982	34.482
454.5	31.903	32.076	32.329	33.101	33.851	35.579	37.741	37.027	34.579
455	31.734	31.413	31.961	33.055	33.6	34.859	37.381	36.837	33.811
455.5	31.491	31.414	32.059	33.022	33.211	34.757	37.078	36.437	34.281
456	31.257	31.043	31.662	32.738	32.817	34.649	36.627	36.385	33.781
456.5	31.033	30.68	31.198	32.343	32.651	34.224	36.548	36.069	33.618
457	30.81	30.952	30.912	31.815	32.712	33.837	36.52	36.024	33.37
457.5	30.675	30.553	30.838	31.755	32.04	33.627	36.007	35.618	33.254
458	30.273	30.044	30.477	31.326	31.647	33.133	35.873	35.27	33.289
458.5	30.067	29.994	30.177	31.236	31.235	32.799	35.298	35.36	33.158
459	29.976	29.872	29.963	30.96	31.199	32.555	35.279	34.856	32.726
459.5	29.667	29.313	29.554	30.447	30.858	32.42	34.685	34.885	32.469
460	29.239	28.985	29.22	29.956	30.501	32.067	34.251	34.488	32.564
460.5	29.243	28.972	29.046	29.743	30.153	31.754	34.346	34.17	32.187
461	29.525	28.563	28.705	29.608	30.013	31.415	34.008	33.905	32.074
461.5	28.961	28.362	28.235	29.221	29.77	31.122	33.398	33.826	31.876
462	28.464	28.281	28.231	29.042	29.317	30.816	33.659	33.694	31.54
462.5	28.342	27.849	28.105	28.358	29.072	30.446	33.156	33.116	31.39
463	28.221	27.536	27.518	28.274	28.565	30.166	33.057	32.894	31.247
463.5	28.176	27.572	27.254	27.999	28.336	29.976	32.43	33.123	31.117
464	28.007	27.409	26.882	27.731	28.037	29.512	32.138	32.646	30.695
464.5	27.489	27.055	26.818	27.588	27.879	29.258	32.041	32.323	30.575
465	27.595	26.853	26.404	27.002	27.519	28.973	31.814	32.258	30.337
465.5	27.002	26.388	26.352	26.843	27.361	28.778	31.257	31.753	30.239
466	26.897	26.069	26.091	26.651	27.093	28.305	31.415	31.729	29.967
466.5	27.017	25.972	25.718	26.45	26.493	28.099	30.997	31.416	30.027
467	26.675	25.593	25.512	26.01	26.022	27.884	30.77	31.243	29.803
467.5	26.08	25.093	25.238	25.804	26.128	27.259	30.442	31.324	29.699
468	26.093	25.197	25.198	25.375	25.871	27.435	30.207	30.656	29.219
468.5	25.856	25.226	25.078	25.101	25.606	27.162	29.797	30.433	29.186
469	25.467	24.593	24.499	24.906	25.169	26.719	29.596	29.926	28.753
469.5	25.477	24.597	24.129	24.589	24.932	26.562	29.172	29.911	28.495
470	25.419	24.317	24	24.416	24.762	26.114	28.965	29.594	28.469
470.5	25.005	24.091	23.893	23.985	24.478	25.921	28.479	29.42	28.131
471	24.879	23.961	23.562	23.64	24.195	25.62	28.354	29.401	28.017
471.5	24.2	23.829	23.356	23.465	24.07	25.434	28.019	28.822	27.698
472	23.928	23.221	22.966	23.215	23.599	25.232	27.723	28.85	27.533
472.5	24.317	23.392	22.735	23.001	23.593	24.75	27.476	28.482	27.454
473	24.403	23.15	22.554	22.904	23.153	24.582	27.4	28.278	27.025
473.5	24.062	23.034	22.444	22.483	22.989	24.232	26.93	28.306	26.887
474	23.792	23.12	22.352	22.163	22.656	24.094	26.663	27.763	26.652
474.5	23.627	22.148	22.036	22.008	22.355	23.986	26.288	27.3	26.888
475	23.213	22.099	21.559	22.164	21.85	23.672	26.191	27.293	26.581
475.5	22.869	21.924	21.368	21.517	21.866	23.276	25.815	26.89	26.203
476	22.771	21.56	21.161	21.212	21.8	23.122	25.914	26.671	26.135
476.5	22.882	21.546	21.017	21.094	21.612	22.799	25.604	26.553	25.769
477	22.596	21.381	20.704	21.152	21.29	22.579	25.318	26.319	25.435
477.5	22.436	21.077	20.589	20.947	21.211	22.26	24.986	26.155	25.478
478	22.234	20.834	20.407	20.525	20.766	22.008	24.638	25.721	25.219
478.5	21.576	20.702	20.126	20.281	20.334	21.894	24.325	25.456	24.851
479	21.603	20.443	19.939	20.244	20.418	21.729	24.175	25.408	24.997
479.5	21.705	20.235	19.704	19.881	20.091	21.39	24.104	25.213	24.489
480	21.397	20.278	19.568	19.556	19.947	21.267	23.821	25.064	24.652
480.5	21.395	20.144	19.407	19.452	19.706	21.163	23.386	24.888	24.27
481	21.313	19.633	19.073	18.945	19.455	20.558	23.148	24.429	23.936
481.5	20.896	19.557	18.827	18.976	19.265	20.478	22.958	24.314	23.774
482	20.851	19.564	18.623	18.853	19.128	20.185	22.978	23.958	23.625
482.5	20.576	19.515	18.784	18.479	18.867	20.214	22.595	23.704	23.334
483	20.344	19.15	18.432	18.19	18.64	19.966	22.323	23.522	23.217
483.5	20.155	18.888	18.163	18.188	18.457	19.482	22.232	23.095	23.037
484	19.88	18.567	17.922	17.937	18.268	19.286	22.078	23.118	22.956
484.5	19.827	18.364	17.81	17.85	18.048	19.148	21.822	22.969	22.738
485	19.302	18.434	17.612	17.531	17.606	18.971	21.484	22.748	22.721
485.5	19.616	18.517	17.565	17.2	17.446	18.768	21.311	22.567	22.432
486	19.45	18.173	17.206	17.126	17.251	18.764	21.143	22.376	22.234
486.5	18.923	17.724	16.818	17.102	17.132	18.398	20.92	22.197	22.103
487	18.813	17.665	17.024	17.031	17.048	18.328	20.851	21.983	21.875
487.5	18.756	17.628	16.913	16.599	16.77	18.158	20.36	21.76	21.629
488	18.816	17.304	16.748	16.458	16.714	18.07	20.241	21.724	21.46
488.5	18.568	17.186	16.323	16.201	16.543	17.819	20.036	21.364	21.297
489	18.236	16.729	16.313	16.072	16.197	17.525	19.757	21.118	21.033
489.5	18.284	16.718	16.224	16.006	16.109	17.272	19.354	20.731	20.949
490	17.872	16.451	15.895	15.911	15.96	17.035	19.378	20.605	20.619
490.5	17.756	16.414	15.882	15.61	15.786	16.927	19.122	20.455	20.719
491	17.747	16.674	15.87	15.672	15.841	16.742	18.778	20.308	20.578
491.5	17.47	16.354	15.703	15.487	15.414	16.542	18.88	20.113	20.352
492	17.532	16.135	15.27	15.159	15.162	16.342	18.873	19.794	19.677
492.5	17.284	16.17	15.181	14.799	14.984	16.047	18.569	19.662	19.789
493	17.288	15.882	14.937	14.845	15.173	15.963	18.375	19.502	19.622
493.5	16.716	15.582	14.845	14.76	14.888	15.6	18.119	19.28	19.434
494	16.827	15.47	14.883	14.634	14.782	15.616	17.81	19.117	19.31
494.5	16.677	15.379	14.744	14.261	14.345	15.527	17.507	18.892	18.967
495	16.52	15.023	14.525	14.119	14.176	15.18	17.416	18.673	18.931
495.5	16.315	15.056	14.288	14.064	14.102	14.976	17.208	18.521	18.741
496	16.424	14.667	14.25	13.877	13.782	14.897	16.965	18.31	18.412
496.5	15.918	14.831	14.112	13.585	13.471	14.676	16.717	18.114	18.389
497	15.693	14.661	13.772	13.614	13.666	14.536	16.495	17.964	18.08
497.5	16.15	14.315	13.653	13.294	13.53	14.489	16.318	17.56	18.01
498	15.731	14.328	13.508	13.123	13.306	14.243	16.248	17.427	17.767
498.5	15.356	14.323	13.391	13.098	13.19	13.974	16.018	17.341	17.604
499	15.341	14.012	13.231	12.924	12.887	13.697	15.9	17.282	17.395
499.5	14.922	13.684	13.001	12.612	12.653	13.608	15.748	17.246	17.339
500	14.825	13.88	13.039	12.596	12.543	13.511	15.438	16.812	17.148
500.5	14.991	13.687	12.789	12.549	12.568	13.406	15.205	16.467	16.998
501	14.491	13.345	12.647	12.332	12.232	13.083	14.913	16.339	16.684
501.5	14.553	13.246	12.387	12.22	12.11	12.912	14.837	16.233	16.584
502	14.51	13.151	12.212	12.196	12.126	12.782	14.725	16.192	16.21
502.5	14.086	12.824	12.145	11.79	11.845	12.603	14.505	15.773	16.134
503	14.049	13.054	11.915	11.648	11.761	12.307	14.383	15.758	16.194
503.5	13.919	12.576	12.031	11.28	11.611	12.303	14.131	15.39	15.805
504	13.755	12.426	11.72	11.414	11.321	12.098	13.833	15.288	15.659
504.5	13.659	12.294	11.724	11.19	11.23	12.014	13.817	15.018	15.445
505	13.175	12.294	11.557	10.986	11.101	11.843	13.619	14.846	15.408
505.5	13.042	12.281	11.393	11.002	11.1	11.793	13.357	14.717	15.198
506	12.694	11.901	11.299	10.916	10.875	11.593	13.213	14.497	15.022
506.5	12.657	11.773	11.386	10.773	10.576	11.424	13.283	14.354	14.914
507	12.417	11.851	11.061	10.562	10.633	11.344	12.928	14.252	14.708
507.5	12.548	11.717	10.734	10.4	10.482	11.337	12.867	14.023	14.367
508	12.615	11.518	10.892	10.249	10.243	11.013	12.766	14.006	14.291
508.5	12.533	11.176	10.6	10.142	10.081	10.951	12.475	13.817	14.298
509	12.252	11.119	10.531	10.072	10.01	10.688	12.229	13.476	14.156
509.5	11.939	11.026	10.413	9.886	9.901	10.436	12.133	13.385	13.967
510	11.606	10.96	10.15	9.835	9.761	10.547	12.073	13.24	13.865
510.5	11.374	10.989	10.147	9.771	9.676	10.553	11.91	13.032	13.641
511	11.576	11.011	10.12	9.526	9.49	10.157	11.734	13.177	13.575
511.5	11.486	10.774	9.992	9.572	9.45	9.955	11.699	12.958	13.425
512	11.418	10.664	9.801	9.497	9.351	9.845	11.497	12.739	13.304
512.5	11.401	10.402	9.597	9.348	9.27	9.854	11.25	12.507	13.109
513	11.318	10.301	9.515	9.129	9.199	9.727	11.103	12.392	13.052
513.5	11.14	10.25	9.298	9.223	9.024	9.583	10.896	12.318	12.825
514	11.157	10.218	9.295	9.057	8.845	9.659	10.874	12.095	12.718
514.5	11.065	9.885	9.45	8.943	8.646	9.384	11.028	11.955	12.687
515	10.787	9.878	9.326	8.827	8.595	9.203	10.745	11.9	12.412
515.5	10.841	9.906	9.254	8.746	8.572	9.174	10.514	11.835	12.328
516	10.701	9.785	9.114	8.469	8.551	8.92	10.345	11.738	12.279
516.5	10.431	9.646	8.901	8.365	8.399	8.846	10.287	11.559	11.987
517	10.506	9.541	8.762	8.363	8.364	8.864	10.184	11.543	11.853
517.5	10.338	9.308	8.706	8.243	8.239	8.798	10.132	11.23	11.827
518	10.269	9.343	8.818	8.186	8.125	8.631	10.005	11.09	11.799
518.5	10.069	9.295	8.63	7.911	7.977	8.483	9.762	11.099	11.704
519	9.992	9.027	8.631	7.96	7.935	8.425	9.569	10.915	11.521
519.5	9.747	8.942	8.222	8.017	7.96	8.297	9.507	10.681	11.293
520	9.785	8.994	8.369	7.769	7.748	8.225	9.433	10.766	11.237
520.5	9.723	8.795	8.172	7.703	7.656	8.179	9.314	10.501	11.071
521	9.621	8.712	7.966	7.638	7.675	7.903	9.134	10.414	11.012
521.5	9.331	8.483	7.896	7.528	7.523	7.906	9.144	10.217	10.772
522	9.536	8.513	7.821	7.418	7.326	7.839	8.972	10.013	10.831
522.5	9.197	8.583	7.607	7.255	7.169	7.766	8.857	9.965	10.624
523	9.147	8.469	7.784	7.205	7.243	7.71	8.811	9.908	10.561
523.5	9.087	8.215	7.644	7.167	7.171	7.545	8.739	9.801	10.485
524	9.083	8.136	7.641	7.114	7.089	7.503	8.581	9.751	10.227
524.5	8.964	8.129	7.44	7.002	6.834	7.434	8.383	9.582	10.268
525	8.948	8.012	7.404	6.925	6.884	7.145	8.375	9.523	10.143
525.5	8.784	7.933	7.258	6.913	6.749	7.168	8.322	9.383	9.933
526	8.673	7.947	7.299	6.681	6.514	7.193	8.248	9.21	9.885
526.5	8.749	7.899	7.148	6.749	6.439	7.044	8.015	9.025	9.669
527	8.603	7.816	6.978	6.674	6.564	6.919	7.889	8.99	9.64
527.5	8.391	7.765	7.031	6.687	6.539	6.859	7.931	8.99	9.587
528	8.265	7.639	7.055	6.536	6.47	6.847	7.837	8.935	9.562
528.5	8.345	7.589	6.841	6.564	6.276	6.687	7.702	8.552	9.32
529	8.343	7.57	6.81	6.419	6.272	6.6	7.611	8.487	9.303
529.5	8.308	7.441	6.739	6.216	6.129	6.427	7.545	8.519	9.141
530	7.996	7.107	6.594	6.218	5.963	6.38	7.435	8.375	9.047
530.5	8.005	7.119	6.449	6.191	5.992	6.36	7.387	8.32	8.898
531	7.878	7.095	6.454	6.051	5.826	6.255	7.166	8.219	8.801
531.5	7.868	6.991	6.496	6.025	5.727	6.13	7.081	8.114	8.85
532	7.755	6.878	6.333	5.92	5.597	6.034	6.951	8.096	8.751
532.5	7.807	6.939	6.268	5.806	5.618	6.024	7.04	8.03	8.468
533	7.609	6.735	6.241	5.805	5.663	5.991	6.973	7.698	8.454
533.5	7.57	6.658	6.18	5.799	5.56	5.928	6.808	7.779	8.318
534	7.497	6.779	6.021	5.622	5.494	5.805	6.726	7.765	8.273
534.5	7.36	6.693	6.049	5.606	5.358	5.768	6.693	7.572	8.158
535	7.293	6.556	5.945	5.509	5.347	5.65	6.539	7.297	8.164
535.5	7.214	6.573	5.924	5.49	5.302	5.579	6.546	7.378	8.034
536	7.236	6.375	5.851	5.42	5.265	5.644	6.426	7.308	7.953
536.5	7.453	6.271	5.912	5.361	5.175	5.539	6.314	7.158	7.832
537	7.134	6.281	5.744	5.308	5.106	5.376	6.284	7.099	7.712
537.5	7.094	6.157	5.545	5.203	5.064	5.322	6.21	6.986	7.605
538	6.967	6.187	5.592	5.145	5.089	5.289	6.105	6.965	7.586
538.5	7.13	6.233	5.522	5.114	5.039	5.336	6.022	6.923	7.498
539	7.227	6.058	5.47	5.002	4.948	5.206	5.949	6.788	7.455
539.5	7.377	5.996	5.464	5.172	4.861	5.144	5.887	6.688	7.337
540	7.382	5.842	5.468	4.999	4.829	5.06	5.828	6.718	7.278
540.5	7.568	5.831	5.242	4.765	4.758	4.989	5.8	6.575	7.117
541	7.609	5.737	5.187	4.703	4.712	4.928	5.74	6.525	7.058
541.5	7.879	5.729	5.101	4.761	4.683	4.925	5.542	6.43	6.939
542	8.233	5.687	5.107	4.628	4.543	4.849	5.556	6.323	6.861
542.5	8.298	5.567	5.101	4.564	4.511	4.737	5.592	6.187	6.841
543	8.725	5.722	5.054	4.542	4.502	4.765	5.495	6.148	6.833
543.5	9.199	5.559	4.993	4.543	4.395	4.633	5.361	6.195	6.604
544	9.808	5.414	4.849	4.519	4.418	4.573	5.223	6.028	6.56
544.5	10.304	5.369	4.841	4.477	4.358	4.454	5.188	5.936	6.488
545	10.617	5.385	4.788	4.428	4.291	4.48	5.059	5.901	6.35
545.5	11.299	5.28	4.805	4.357	4.142	4.461	4.99	5.799	6.354
546	11.974	5.171	4.819	4.267	4.156	4.336	5.026	5.645	6.279
546.5	12.613	4.966	4.548	4.239	4.141	4.305	4.953	5.596	6.202
547	13.656	5.097	4.555	4.143	4.037	4.268	4.959	5.539	6.126
547.5	14.722	4.986	4.533	4.159	3.943	4.26	4.736	5.518	5.934
548	15.845	4.886	4.491	4.105	3.885	4.098	4.666	5.386	5.942
548.5	17.025	4.832	4.451	4.091	3.837	4.012	4.633	5.431	5.959
549	18.436	4.755	4.367	3.904	3.889	4.002	4.539	5.335	5.844
549.5	19.698	4.649	4.317	3.946	3.744	4.019	4.529	5.234	5.789
550	20.889	4.655	4.299	3.899	3.703	3.908	4.549	5.171	5.676
550.5	22.262	4.731	4.187	3.795	3.713	3.862	4.376	5.081	5.488
551	23.541	4.856	4.153	3.799	3.656	3.778	4.34	5.063	5.554
551.5	25.257	4.73	4.021	3.808	3.583	3.749	4.324	4.985	5.515
552	26.862	4.516	4.09	3.778	3.518	3.682	4.264	4.926	5.297
552.5	28.539	4.538	3.974	3.665	3.407	3.683	4.207	4.851	5.4
553	30.387	4.381	3.937	3.662	3.517	3.677	4.191	4.766	5.306
553.5	32.009	4.313	4	3.475	3.374	3.508	4.007	4.683	5.096
554	33.388	4.323	3.915	3.456	3.331	3.485	3.987	4.676	5.137
554.5	35.188	4.282	3.865	3.48	3.298	3.49	3.912	4.482	5.024
555	36.78	4.262	3.661	3.382	3.189	3.378	3.879	4.474	4.889
555.5	38.132	4.267	3.592	3.452	3.225	3.334	3.852	4.43	4.816
556	39.209	4.312	3.651	3.343	3.064	3.291	3.769	4.324	4.854
556.5	40.884	4.146	3.732	3.281	3.093	3.344	3.775	4.226	4.721
557	42.673	4.121	3.638	3.196	3.071	3.238	3.636	4.248	4.635
557.5	44.117	4.26	3.611	3.174	2.995	3.17	3.579	4.138	4.597
558	45.113	4.374	3.436	3.15	2.982	3.03	3.578	4.085	4.536
558.5	46.666	4.346	3.358	3.026	2.948	3.059	3.522	3.981	4.44
559	47.629	4.336	3.339	3.015	2.932	3.075	3.417	3.953	4.384
559.5	49.777	4.663	3.218	2.962	2.844	2.897	3.329	3.931	4.328
560	51.115	4.775	3.273	2.921	2.735	2.834	3.254	3.769	4.215
560.5	51.956	4.803	3.185	2.87	2.692	2.808	3.273	3.794	4.213
561	53.213	5.108	3.12	2.79	2.733	2.791	3.107	3.723	4.175
561.5	54.767	5.511	3.097	2.741	2.65	2.721	3.17	3.604	4.024
562	56.823	5.856	2.987	2.789	2.496	2.648	3.042	3.525	3.941
562.5	57.122	6.277	3.006	2.669	2.561	2.656	3.023	3.467	3.866
563	58.192	6.858	2.897	2.616	2.532	2.548	2.927	3.442	3.775
563.5	60.119	7.468	2.84	2.628	2.445	2.521	2.861	3.327	3.777
564	61.25	8.1	2.811	2.576	2.376	2.466	2.838	3.331	3.718
564.5	63.085	8.726	2.796	2.485	2.374	2.413	2.755	3.311	3.606
565	64.301	9.706	2.752	2.441	2.268	2.387	2.662	3.169	3.471
565.5	64.851	10.47	2.726	2.38	2.255	2.372	2.647	3.018	3.477
566	66.185	11.678	2.622	2.391	2.235	2.301	2.585	2.99	3.386
566.5	67.014	13.214	2.662	2.333	2.171	2.234	2.535	2.927	3.289
567	68.055	14.618	2.507	2.303	2.143	2.151	2.462	2.954	3.241
567.5	68.68	15.95	2.493	2.262	2.094	2.087	2.402	2.834	3.196
568	69.229	17.619	2.532	2.196	2.071	2.013	2.401	2.744	3.12
568.5	69.459	19.447	2.426	2.137	2.013	2.045	2.329	2.721	3.008
569	70.017	21.429	2.452	2.131	1.911	1.998	2.271	2.601	2.937
569.5	70.313	23.234	2.341	2.105	1.903	1.941	2.258	2.597	2.996
570	69.768	25.794	2.296	2.022	1.929	1.988	2.132	2.536	2.891
570.5	69.27	27.895	2.203	2.019	1.862	1.828	2.102	2.476	2.795
571	69.086	30.116	2.272	2.018	1.759	1.862	2.127	2.441	2.759
571.5	68.707	32.779	2.234	1.9	1.825	1.811	2.062	2.408	2.667
572	68.345	35.378	2.249	1.841	1.771	1.83	1.999	2.31	2.613
572.5	67.331	37.866	2.247	1.908	1.755	1.808	1.983	2.268	2.59
573	66.125	40.829	2.197	1.832	1.78	1.722	1.899	2.262	2.521
573.5	64.473	43.777	2.16	1.787	1.78	1.723	1.984	2.142	2.461
574	62.656	46.642	2.172	1.783	1.668	1.639	1.857	2.134	2.408
574.5	60.711	50.127	2.174	1.765	1.626	1.612	1.772	2.071	2.357
575	58.283	52.869	2.155	1.701	1.58	1.62	1.775	2.027	2.298
575.5	56.961	55.723	2.169	1.667	1.565	1.539	1.734	2.014	2.3
576	53.76	59.024	2.244	1.658	1.476	1.539	1.716	1.981	2.276
576.5	50.943	62.132	2.442	1.648	1.457	1.495	1.707	1.902	2.165
577	49.459	64.852	2.566	1.659	1.471	1.501	1.66	1.845	2.094
577.5	47.308	68.001	2.729	1.698	1.454	1.506	1.608	1.821	2.111
578	44.135	71.456	2.977	1.595	1.449	1.426	1.555	1.827	2.052
578.5	41.375	73.961	3.169	1.555	1.439	1.38	1.53	1.788	2.055
579	39.15	76.082	3.551	1.538	1.37	1.391	1.558	1.699	2.009
579.5	36.39	79.198	3.951	1.483	1.379	1.342	1.528	1.673	1.933
580	34.348	81.521	4.416	1.545	1.396	1.335	1.483	1.679	1.916
580.5	31.76	83.618	4.777	1.537	1.366	1.301	1.467	1.659	1.857
581	28.973	86.754	5.561	1.545	1.286	1.267	1.423	1.599	1.835
581.5	27.285	88.785	6.293	1.478	1.333	1.249	1.392	1.616	1.805
582	25.131	89.834	7.015	1.473	1.324	1.271	1.375	1.566	1.768
582.5	22.765	92.341	7.814	1.483	1.301	1.246	1.342	1.551	1.767
583	20.967	94.027	8.877	1.45	1.285	1.229	1.349	1.52	1.716
583.5	19.271	95.48	10.188	1.416	1.228	1.215	1.336	1.495	1.673
584	17.688	96.494	11.505	1.375	1.243	1.201	1.317	1.475	1.594
584.5	15.772	98.019	12.707	1.373	1.216	1.176	1.252	1.398	1.623
585	14.352	98.842	14.421	1.396	1.252	1.201	1.241	1.37	1.608
585.5	13.126	99.653	16.029	1.339	1.177	1.171	1.25	1.38	1.578
586	11.977	100.091	17.974	1.31	1.171	1.112	1.198	1.342	1.504
586.5	11.333	99.973	20.152	1.317	1.159	1.139	1.172	1.33	1.469
587	10.282	99.739	21.987	1.333	1.184	1.118	1.2	1.304	1.416
587.5	9.195	100.069	24.158	1.304	1.09	1.136	1.192	1.266	1.423
588	8.429	100.717	26.428	1.323	1.109	1.102	1.145	1.289	1.415
588.5	7.886	98.886	28.832	1.297	1.118	1.078	1.142	1.259	1.402
589	7.378	98.504	31.471	1.289	1.098	1.071	1.128	1.258	1.41
589.5	6.923	97.253	34.284	1.271	1.082	1.051	1.138	1.236	1.374
590	6.558	95.43	37.212	1.241	1.031	1.025	1.144	1.231	1.335
590.5	6.025	93.928	39.311	1.276	1.054	0.992	1.091	1.167	1.343
591	5.72	91.749	42.472	1.298	1.057	1.02	1.096	1.183	1.31
591.5	5.53	88.907	45.174	1.305	1.039	0.983	1.061	1.161	1.252
592	5.445	86.431	48.477	1.239	1.023	0.956	1.032	1.158	1.239
592.5	5.443	84.094	50.971	1.274	0.972	0.983	1.045	1.127	1.221
593	5.275	81.115	53.969	1.386	1.023	0.989	1.004	1.122	1.209
593.5	5.192	78.297	56.997	1.413	0.986	0.996	0.96	1.092	1.204
594	5.16	74.867	59.922	1.45	1.012	0.963	0.956	1.038	1.233
594.5	4.962	71.602	63.466	1.597	1.004	0.903	0.996	1.01	1.191
595	4.942	68.146	66.214	1.7	0.978	0.921	0.995	1.06	1.147
595.5	4.857	64.819	69.05	1.831	1.022	0.937999	0.947	1.061	1.108
596	4.93	61.419	71.358	1.899	0.992	0.919	0.952	1.042	1.106
596.5	4.955	57.959	74.878	2.141	1	0.898	0.929	1.013	1.113
597	5.128	54.247	78.594	2.521	0.963	0.92	0.934	0.978	1.05
597.5	5.108	50.335	81.097	2.814	0.957	0.889	0.922	0.967	1.028
598	5.177	46.458	84.117	3.261	0.986	0.863	0.894	0.952	1.017
598.5	5.131	43.196	86.231	3.783	0.932	0.88	0.929	0.969	1.077
599	5.254	39.843	88.112	4.26	0.946	0.883	0.917	0.962	0.988
599.5	5.178	36.818	91.192	4.858	0.947	0.885	0.88	0.991	0.98
600	5.352	34.255	93.684	5.628	0.867	0.855	0.835	0.938999	1.038
